# Supplementary material for: Mutational signatures of DNA mismatch repair deficiency in C. elegans and human cancers
Source: PubMed Central journal article supplement (PMC5932607; doi:10.1101/gr.226845.117), 2018-05
Supplement: supp_gr.226845.117_Supplemental_Fig_S1.pdf [file supp_gr.226845.117_Supplemental_Fig_S1.pdf]

**A**

T>A (in ATT context)  
two adjacent repeats

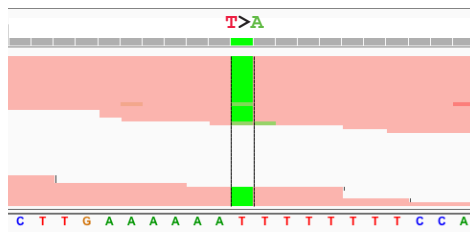

single repeat

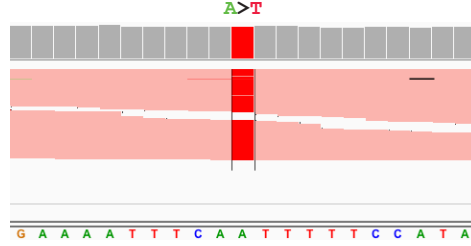

**B**

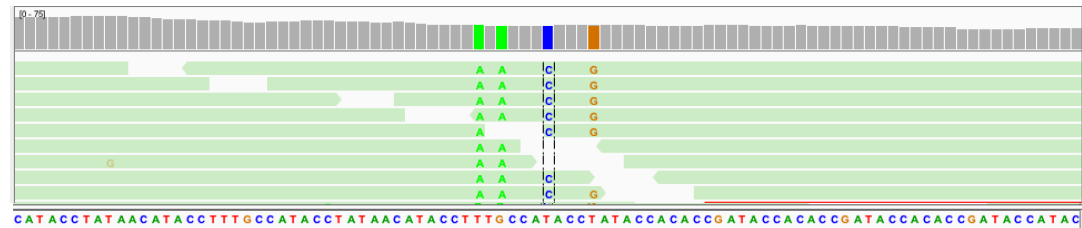

wild-type

(CCATACCTATAACATACCTTTG) 2 CCATACCTATAACATACCTTTG CCATACCTATAACCACCCG (ATACCACCCG) 2

*mlh-1* F20 (CD0134a)

(CCATACCTATAACATACCTTTG) 2 CCATACCTATAACATACCTATA CCACCCGATACCACCCG (ATACCACCCG) 2

**C**

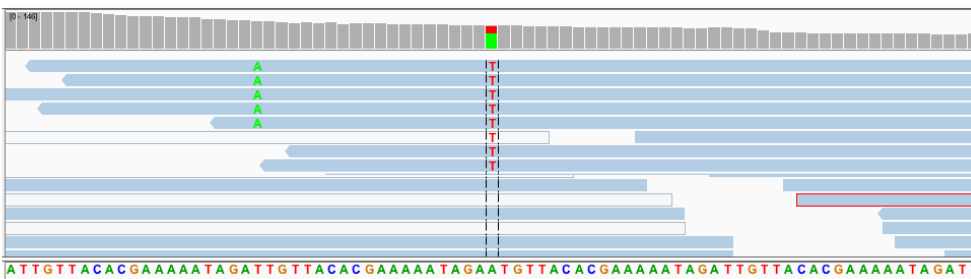

wild-type

(TGTTACACGAAAAATAGAT) n TGTTACACGAAAAATAGAA (TGTTACACGAAAAATAGAT) 2

*mlh-1* F20 (CD0134c)

(TGTTACACGAAAAATAGAT) n TGTTACACGAAAAATAGAT (TGTTACACGAAAAATAGAT) 2

**D**

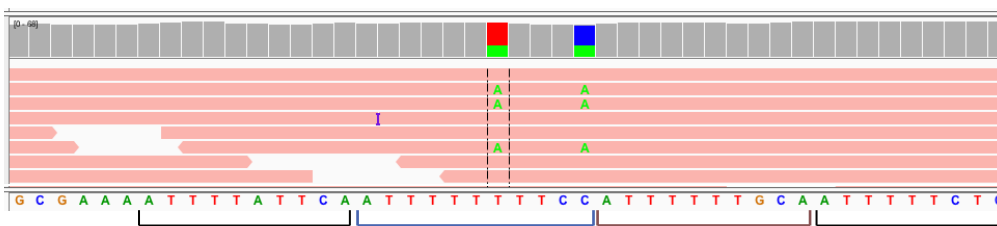

wild-type

ATTTTATTCA ATTTTTTTTCC ATTTTTTGCA

*mlh-1* F20 (CD0134d)

ATTTTATTCA ATTTTTATTCA ATTTTTTGCA
