# Supplementary material for: Mutational signatures of DNA mismatch repair deficiency in C. elegans and human cancers
Source: PubMed Central journal article supplement (PMC5932607; doi:10.1101/gr.226845.117), 2018-05

**A**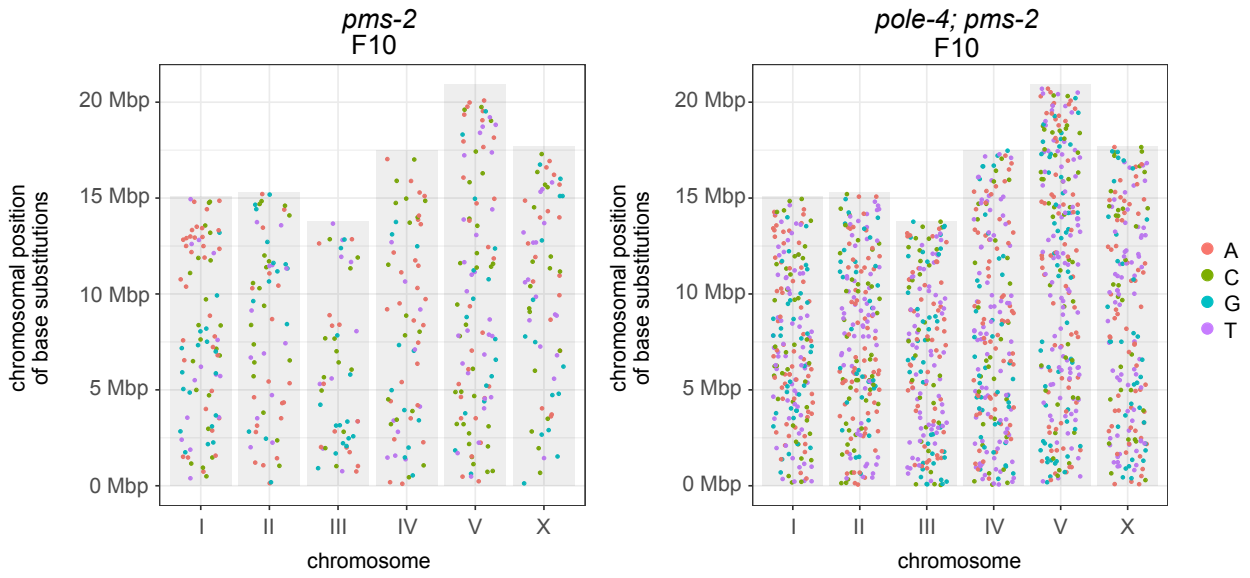**B**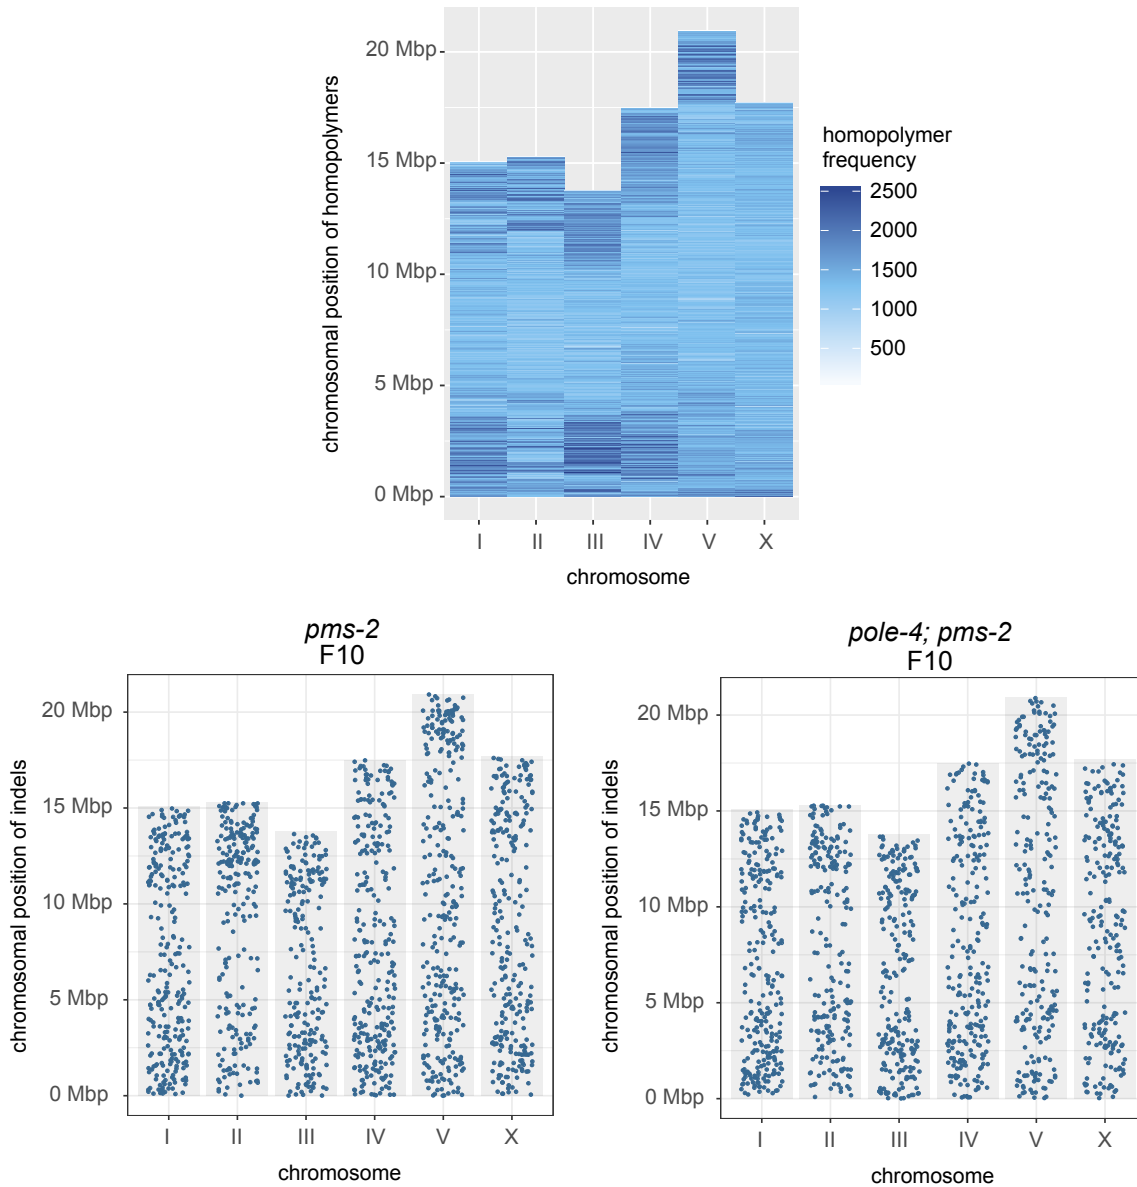

Supplement: supp_gr.226845.117_Supplemental_Fig_S2.pdf [file supp_gr.226845.117_Supplemental_Fig_S2.pdf]
