# Supplementary material for: Mutational signatures of DNA mismatch repair deficiency in C. elegans and human cancers
Source: PubMed Central journal article supplement (PMC5932607; doi:10.1101/gr.226845.117), 2018-05

A

Homopolymer frequency in well covered exonic regions

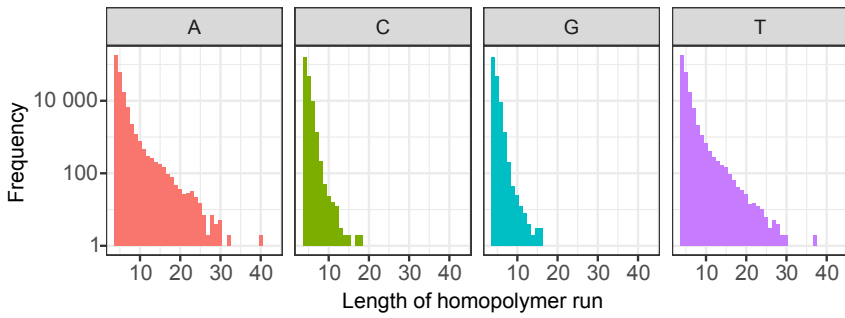

Homopolymer distribution by base

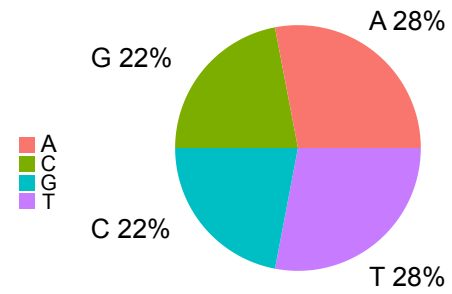

B

1 bp indels in homopolymers in COAD samples with MSI

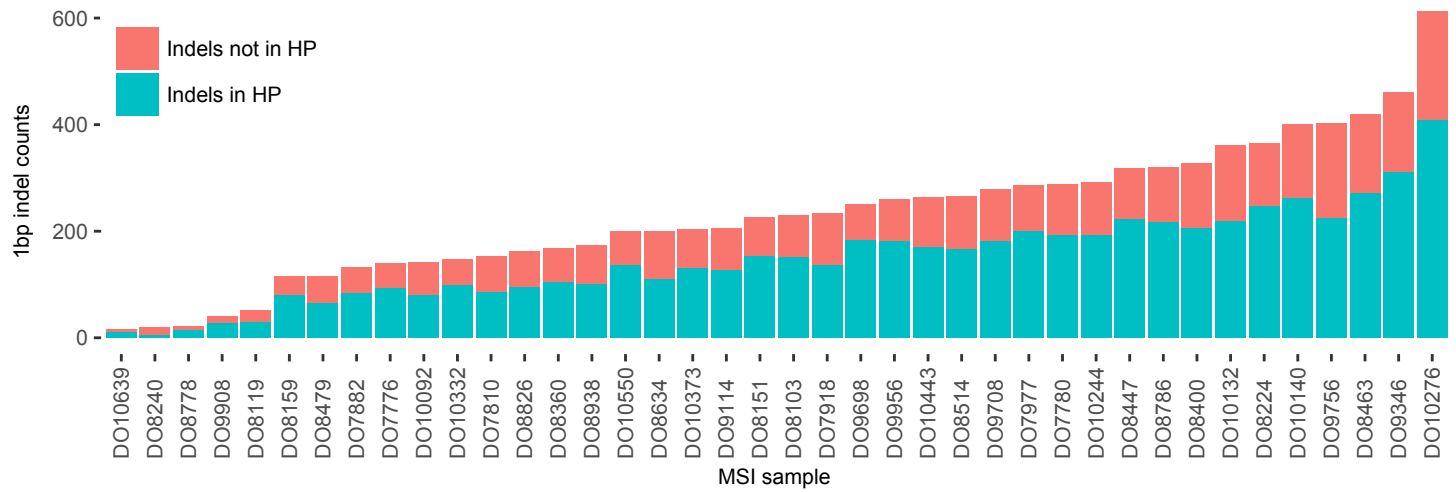

1 bp indels in homopolymers in STAD samples with MSI

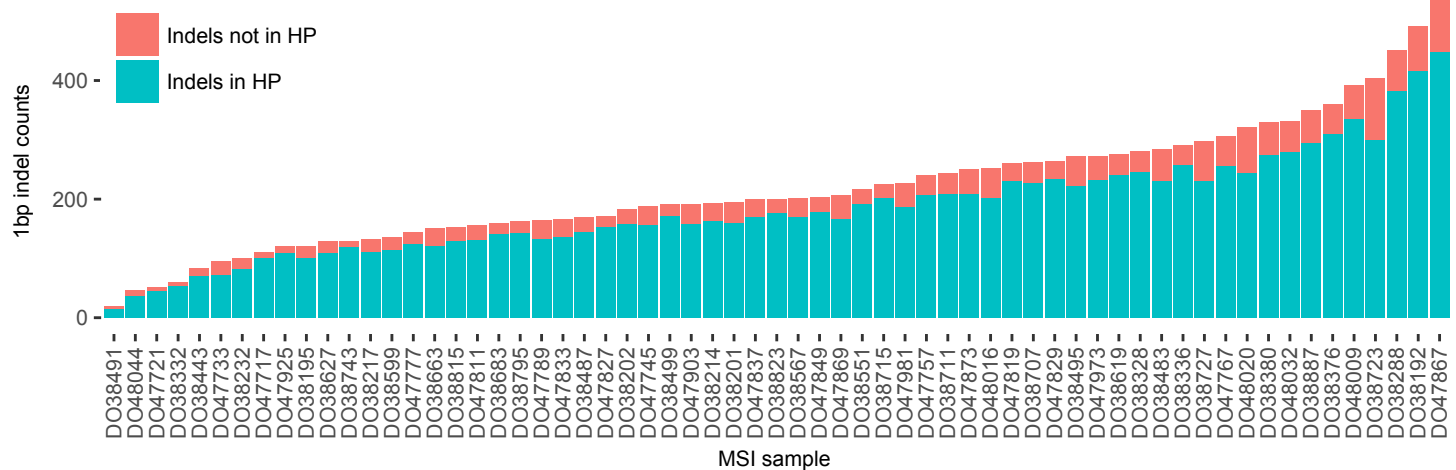

Supplement: supp_gr.226845.117_Supplemental_Fig_S4.pdf [file supp_gr.226845.117_Supplemental_Fig_S4.pdf]
