# Supplementary material for: Mutational signatures of DNA mismatch repair deficiency in C. elegans and human cancers
Source: PubMed Central journal article supplement (PMC5932607; doi:10.1101/gr.226845.117), 2018-05

A

## Signature decomposition for all samples in COAD cohort

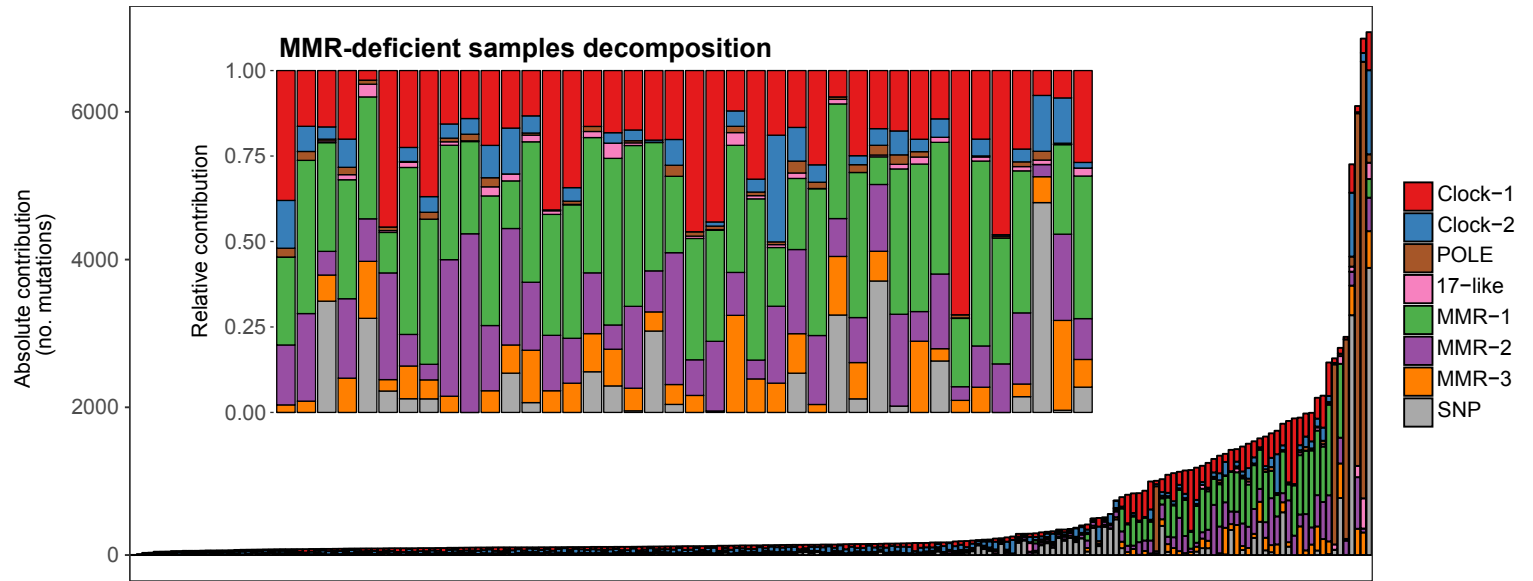

B

## Signature decomposition for all samples in COAD cohort

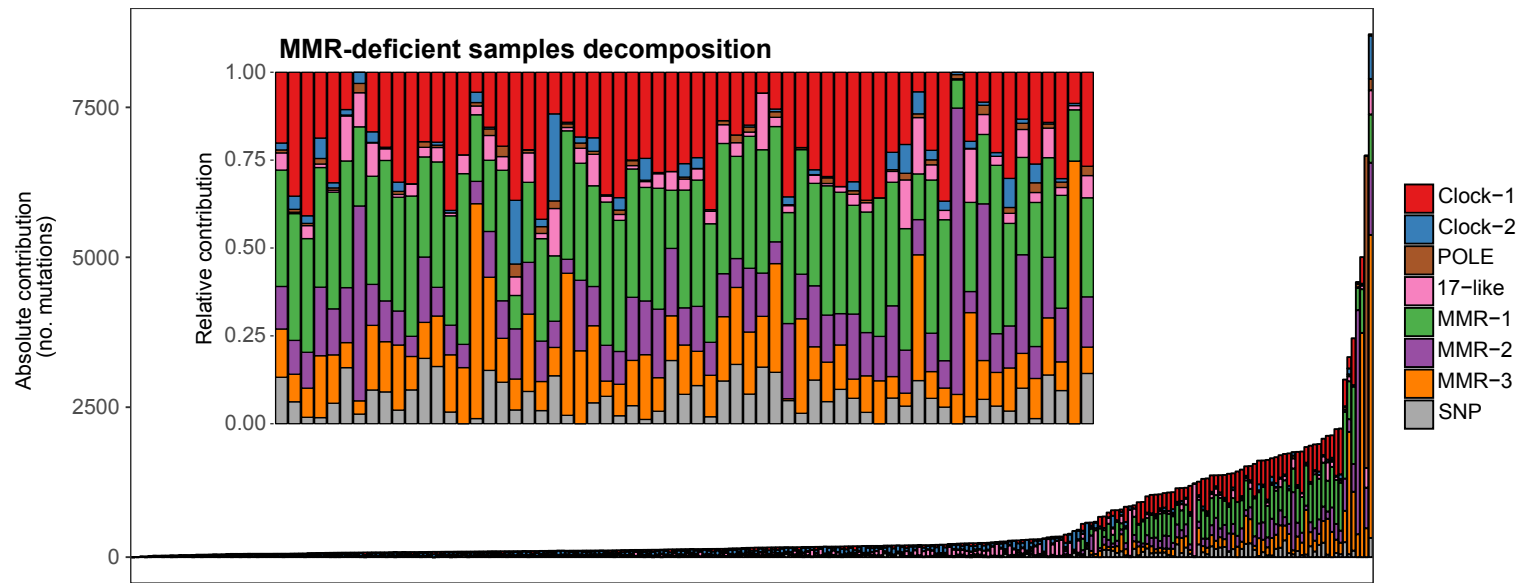

C

## Aggregated mutational profiles of MSI samples in COAD (top) and STAD (bottom) cohorts

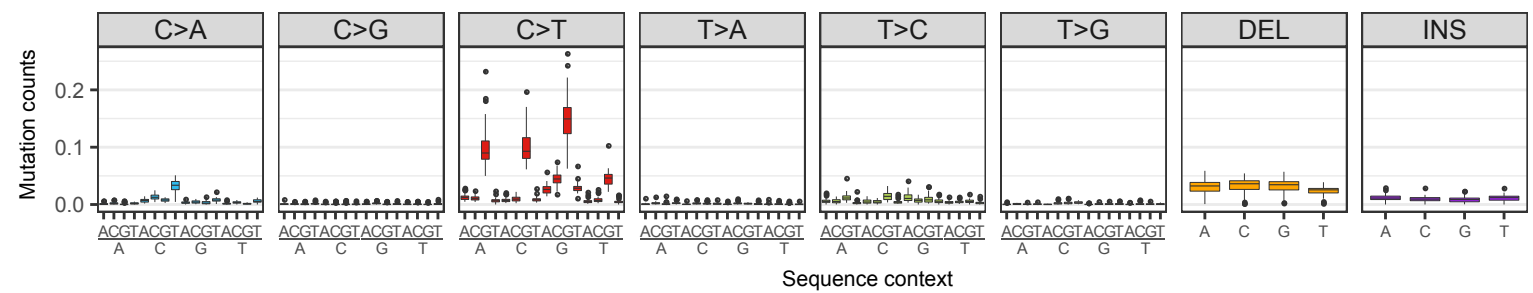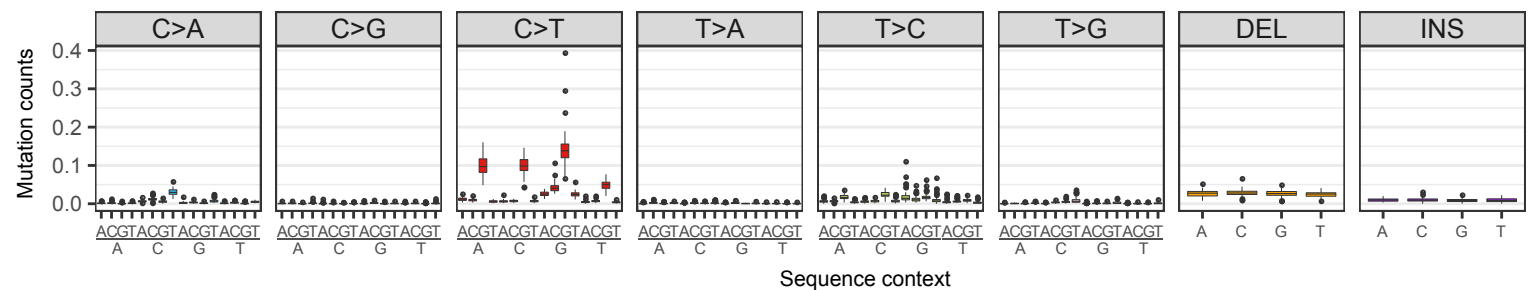

Supplement: supp_gr.226845.117_Supplemental_Fig_S5.pdf [file supp_gr.226845.117_Supplemental_Fig_S5.pdf]
