# Supplementary material for: Mutational signatures of DNA mismatch repair deficiency in C. elegans and human cancers
Source: PubMed Central journal article supplement (PMC5932607; doi:10.1101/gr.226845.117), 2018-05

**A** Distribution of similarities between COSMIC cancer signatures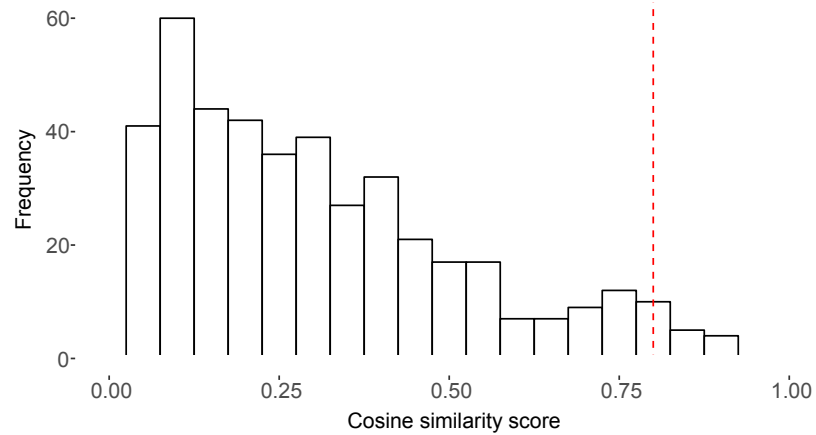**B** Distribution of similarities between uniform random vectors from positive cone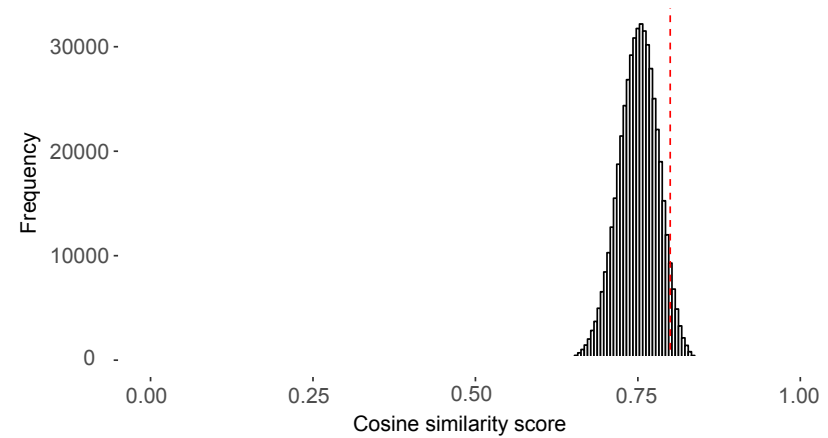**C** Distribution of similarities between *C. elegans* signatures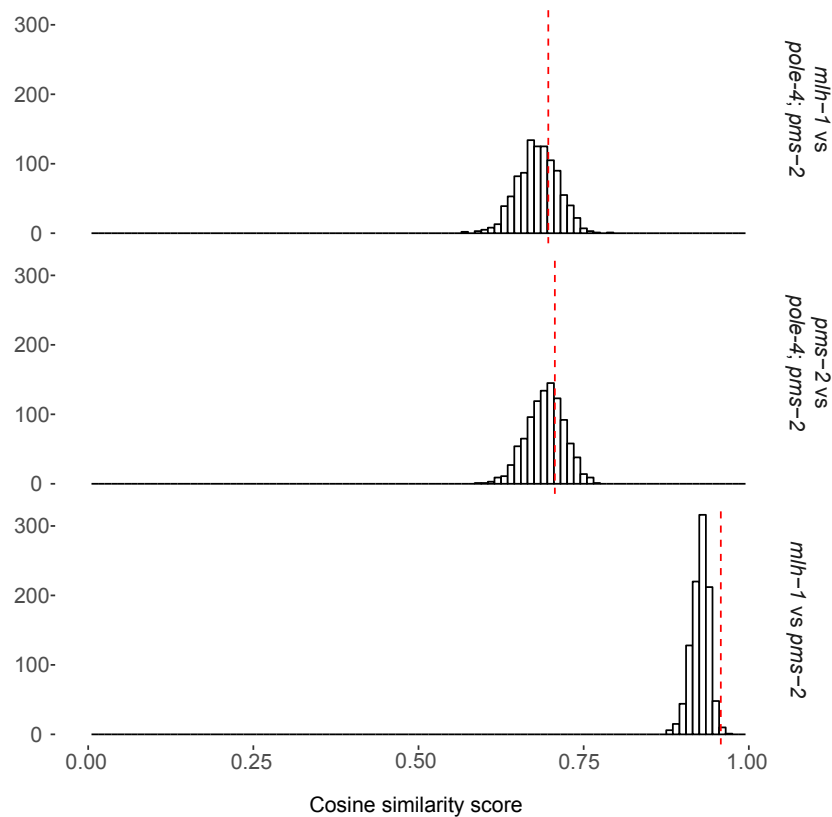**D** Distribution of similarities between *mlh-1* and MMR-1 signatures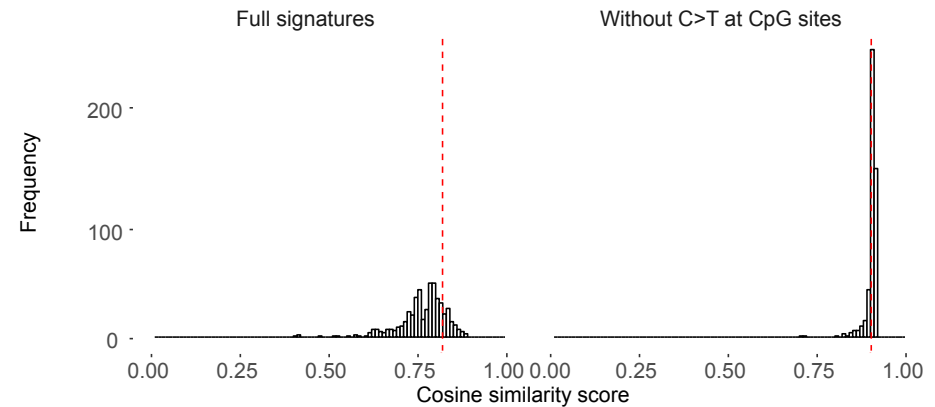Distribution of similarities between *pms-2* and MMR-1 signatures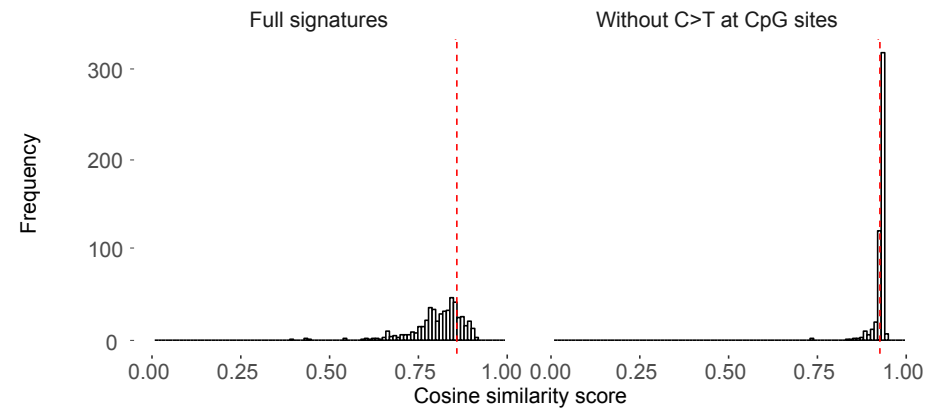

Supplement: supp_gr.226845.117_Supplemental_Fig_S6.pdf [file supp_gr.226845.117_Supplemental_Fig_S6.pdf]
