# Supplementary material for: Mutational signatures of DNA mismatch repair deficiency in C. elegans and human cancers
Source: HighWire-hosted journal article supplement (doi:10.1101/gr.226845.117), 2018-04-10
Supplement: Supplemental_Table_S1.docx [file Supplemental_Table_S1.docx]

**Supplemental Table S1.** MutS and MutL complexes in *H. sapiens* and *C. elegans*.

|  | complex | *H. sapiens* | *C. elegans*  (query cover/ identity to human homolog) |
| --- | --- | --- | --- |
| MutS | MutS*α*  MutS*β* | MSH2/ MSH6  MSH2/ MSH3 | MSH-2 (90%/31%)/ MSH-6 (70%/40%)  - (1) |
| MutL | MutL*α*  MutL*β*  MutL*γ* | MLH1/PMS2  MLH1/ PMS1  MLH1/ MLH3 | MLH-1(99%/34%)/ PMS-2 (66%/41%)  - (2)  - (3) |

(1) *C. elegans* proteins with highest similarity to human MutS*β* subunit MSH3 using blastp are MSH-6 (Query cover 75%, Identity 26%) and MSH-2 (Query cover 50%, Identity 29%). (2) *C. elegans* proteins with similarity to human MutL*β* subunit PMS1 are PMS-2 (Query cover 63%, Identity 29%) and MLH-1 (Query cover 34%, Identity 31%). (3) *C. elegans* proteins with similarity to human MutL*γ* subunit MLH3 are MLH-1 (Query cover 16%, Identity 31%) and PMS-2 (Query cover 33%, Identity 24%).
