# Supplementary material for: Mutational signatures of DNA mismatch repair deficiency in C. elegans and human cancers
Source: HighWire-hosted journal article supplement (doi:10.1101/gr.226845.117), 2018-04-10
Supplement: Supplemental_Table_S2.docx [file Supplemental_Table_S2.docx]

**Supplemental Table S2.** Average number of unique mutations identified genome-wide in wild-type, *pms-2* and *pole-4* single mutants and *pole-4; pms-2* double mutants grown over 10 generations.

| genotype | mutation type |  | average number  observed | average # as % of all  mutations |
| --- | --- | --- | --- | --- |
| wild-type | base subs  indels  SVs | transitions  transversions  1 base insertions  1 base deletions  2 base insertions  2 base deletions  larger insertions  larger deletions  complex indels | 3.7  6.3  1.3  4.3  0.7  1.7  0  1.7  0.3  0 |  |
| *pms-2* | base subs  indels  SVs | transitions  transversions  1 base insertions  1 base deletions  2 base insertions  2 base deletions  larger insertions  larger deletions  complex indels | 91.3  53.7  188.3  288.3  13.3  24.7  3  8  1  0 | 13.6 %  8.0 %  28.0 %  42.9 %  2.0 %  3.7 %  0.5 %  1.2 %  0.15 %  0 % |
| *pole-4* | base subs  indels  SVs | transitions  transversions  1 base insertions  1 base deletions  2 base insertions  2 base deletions  larger insertions  larger deletions  complex indels | 6  9.3  2  1.3  0.7  1.7  0.3  1  0.3  0.3 |  |
| *pole-4; pms-2* | base subs  indels  SVs | transitions  transversions  1 base insertions  1 base deletions  2 base insertions  2 base deletions  larger insertions  larger deletions  complex indels | 502  134.5  272.5  390.5  14.5  26  3.5  16  0  0 | 36.9 %  9.9 %  20.0 %  28.7 %  1.1 %  1.9 %  0.3 %  1.2 %  0 %  0 % |

base subs = base substitutions

indels = insertions/deletions

SVs = structural variants

Values shown in % are rounded to one digit after the decimal point.
