# Supplementary material for: Mutational signatures of DNA mismatch repair deficiency in C. elegans and human cancers
Source: HighWire-hosted journal article supplement (doi:10.1101/gr.226845.117), 2018-04-10
Supplement: Supplemental_Table_S3.xlsx [file Supplemental_Table_S3.xlsx]

## Sheet: Legend
Supplementary Table 3.1. MMR mutations in COAD and STAD datasets
ICGC_DONOR_ID		ICGC donor ID
PROJECT_CODE		ICGC project code (STAD or COAD)
MUTATION_TYPE		Type of mutation found
IMPACT_TYPE		Impact of the mutation
GENE_AFFECTED		MMR-related gene affected by the mutation
Supplementary Table 3.2. Samples with MLH1 hypermethylation across COAD and STAD datasets
ICGC_DONOR_ID		ICGC donor ID
PROJECT_CODE		ICGC project code (STAD or COAD)
AVERAGE_METHYLATION		Average methylation values across 43 CpG sites in the CpG island overlapping MLH1 promoter
CONSIDERED HYPERMETHYLATED		Average methylation value higher than 0.3

## Sheet: MMR mutations
ICGC_DONOR_ID	PROJECT_CODE	MUTATION_TYPE	IMPACT_TYPE	GENE_AFFECTED
DO9346	COAD-US	deletion of <=200bp	frameshift_variant	MSH3
DO8119	COAD-US	single base substitution	missense_variant	MLH1
DO8119	COAD-US	insertion of <=200bp	frameshift_variant	MSH6
DO9490	COAD-US	single base substitution	stop_gained	PMS1
DO8159	COAD-US	deletion of <=200bp	frameshift_variant	MSH2
DO8151	COAD-US	deletion of <=200bp	frameshift_variant	MLH1
DO9114	COAD-US	single base substitution	missense_variant	MLH3
DO9114	COAD-US	single base substitution	missense_variant	MSH3
DO9210	COAD-US	single base substitution	missense_variant	MSH6
DO9082	COAD-US	single base substitution	missense_variant	PMS2
DO9082	COAD-US	single base substitution	missense_variant	MSH6
DO9082	COAD-US	single base substitution	missense_variant	MLH3
DO10550	COAD-US	single base substitution	missense_variant	MSH6
DO10550	COAD-US	single base substitution	stop_gained	MSH2
DO10132	COAD-US	deletion of <=200bp	frameshift_variant	MSH6
DO10092	COAD-US	deletion of <=200bp	frameshift_variant	MLH1
DO10397	COAD-US	single base substitution	missense_variant	PMS1
DO10244	COAD-US	single base substitution	missense_variant	MLH1
DO10276	COAD-US	deletion of <=200bp	frameshift_variant	MLH3
DO10276	COAD-US	single base substitution	missense_variant	MSH6
DO7958	COAD-US	single base substitution	missense_variant	MSH3
DO7882	COAD-US	deletion of <=200bp	frameshift_variant	MSH2
DO7882	COAD-US	deletion of <=200bp	frameshift_variant	MLH1
DO8826	COAD-US	single base substitution	missense_variant	PMS2
DO8874	COAD-US	single base substitution	missense_variant	PMS1
DO8842	COAD-US	single base substitution	missense_variant	MSH6
DO8842	COAD-US	single base substitution	missense_variant	EPCAM
DO8842	COAD-US	single base substitution	stop_gained	MSH2
DO8842	COAD-US	single base substitution	missense_variant	PMS1
DO8842	COAD-US	single base substitution	missense_variant	MLH3
DO8842	COAD-US	single base substitution	stop_gained	MLH3
DO8938	COAD-US	insertion of <=200bp	frameshift_variant	MSH6
DO8432	COAD-US	single base substitution	missense_variant	MSH3
DO8479	COAD-US	insertion of <=200bp	frameshift_variant	MSH2
DO8463	COAD-US	single base substitution	missense_variant	MSH2
DO8463	COAD-US	single base substitution	missense_variant	MSH3
DO8463	COAD-US	insertion of <=200bp	frameshift_variant	MLH1
DO8447	COAD-US	single base substitution	missense_variant	PMS1
DO8447	COAD-US	deletion of <=200bp	frameshift_variant	MLH1
DO8224	COAD-US	single base substitution	missense_variant	MSH2
DO8224	COAD-US	deletion of <=200bp	frameshift_variant	MLH3
DO8224	COAD-US	deletion of <=200bp	frameshift_variant	MSH3
DO8264	COAD-US	single base substitution	missense_variant	MLH3
DO8264	COAD-US	single base substitution	missense_variant	MSH6
DO8264	COAD-US	single base substitution	missense_variant	MSH2
DO8264	COAD-US	single base substitution	missense_variant	MLH3
DO8264	COAD-US	single base substitution	missense_variant	MSH3
DO8264	COAD-US	single base substitution	stop_gained	PMS1
DO9602	COAD-US	single base substitution	missense_variant	PMS1
DO38823	STAD-US	single base substitution	missense_variant	EPCAM
DO38831	STAD-US	single base substitution	missense_variant	MSH6
DO38887	STAD-US	single base substitution	missense_variant	MSH6
DO38887	STAD-US	single base substitution	stop_gained	MSH3
DO38887	STAD-US	single base substitution	missense_variant	MSH6
DO38887	STAD-US	single base substitution	missense_variant	PMS2
DO38571	STAD-US	single base substitution	missense_variant	MSH3
DO38551	STAD-US	insertion of <=200bp	frameshift_variant	MSH6
DO38491	STAD-US	deletion of <=200bp	frameshift_variant	MSH2
DO38487	STAD-US	single base substitution	missense_variant	MSH3
DO38499	STAD-US	single base substitution	missense_variant	MSH6
DO38499	STAD-US	single base substitution	stop_gained	MLH1
DO38408	STAD-US	single base substitution	missense_variant	MSH6
DO38404	STAD-US	single base substitution	missense_variant	MSH3
DO38404	STAD-US	single base substitution	missense_variant	MLH3
DO38376	STAD-US	deletion of <=200bp	frameshift_variant	MLH1
DO38707	STAD-US	single base substitution	missense_variant	MLH1
DO38715	STAD-US	single base substitution	missense_variant	MSH6
DO38715	STAD-US	single base substitution	missense_variant	MLH3
DO38711	STAD-US	single base substitution	missense_variant	PMS1
DO38791	STAD-US	single base substitution	missense_variant	PMS1
DO38799	STAD-US	single base substitution	missense_variant	MSH2
DO38795	STAD-US	single base substitution	missense_variant	PMS2
DO38795	STAD-US	single base substitution	missense_variant	PMS2
DO48044	STAD-US	single base substitution	missense_variant	MSH6
DO48016	STAD-US	single base substitution	missense_variant	MSH3
DO48016	STAD-US	single base substitution	stop_gained	MLH1
DO48020	STAD-US	single base substitution	missense_variant	MSH6
DO48009	STAD-US	single base substitution	missense_variant	MLH3
DO48009	STAD-US	single base substitution	missense_variant	MSH6
DO47873	STAD-US	insertion of <=200bp	frameshift_variant	MSH6
DO47849	STAD-US	insertion of <=200bp	frameshift_variant	MSH6
DO47849	STAD-US	insertion of <=200bp	frameshift_variant	PMS2
DO47829	STAD-US	single base substitution	missense_variant	MSH3
DO47829	STAD-US	insertion of <=200bp	frameshift_variant	MSH6
DO47813	STAD-US	single base substitution	missense_variant	PMS1
DO47789	STAD-US	single base substitution	missense_variant	PMS1
DO47789	STAD-US	single base substitution	missense_variant	PMS2
DO47769	STAD-US	single base substitution	missense_variant	MSH3
DO47769	STAD-US	single base substitution	missense_variant	MSH2
DO47769	STAD-US	single base substitution	missense_variant	MLH3
DO47769	STAD-US	single base substitution	missense_variant	MSH3
DO47757	STAD-US	insertion of <=200bp	frameshift_variant	MSH6
DO47753	STAD-US	single base substitution	missense_variant	PMS1
DO47743	STAD-US	single base substitution	missense_variant	PMS2
DO47903	STAD-US	insertion of <=200bp	frameshift_variant	MSH6
DO47981	STAD-US	insertion of <=200bp	frameshift_variant	MSH3
DO47973	STAD-US	single base substitution	missense_variant	MSH6
DO38328	STAD-US	single base substitution	missense_variant	PMS1
DO38328	STAD-US	single base substitution	missense_variant	MLH3
DO38332	STAD-US	deletion of <=200bp	frameshift_variant	MLH1
DO38276	STAD-US	insertion of <=200bp	frameshift_variant	MSH6
DO38202	STAD-US	insertion of <=200bp	frameshift_variant	MSH6
DO38201	STAD-US	deletion of <=200bp	frameshift_variant	MLH1
DO38200	STAD-US	single base substitution	stop_gained	MSH2
DO38192	STAD-US	single base substitution	missense_variant	MSH6
DO38192	STAD-US	deletion of <=200bp	frameshift_variant	MSH2
DO38192	STAD-US	single base substitution	missense_variant	MLH3
DO38192	STAD-US	single base substitution	missense_variant	MSH3
DO38192	STAD-US	single base substitution	missense_variant	MSH6

## Sheet: MLH1 methylation
ICGC_DONOR_ID	PROJECT_CODE	AVERAGE_METHYLATION	CONSIDERED HYPERMETHYLATED
DO8039	COAD-US	0.480439	TRUE
DO9346	COAD-US	0.428671	TRUE
DO8103	COAD-US	0.385809	TRUE
DO8151	COAD-US	0.652827	TRUE
DO8127	COAD-US	0.738918	TRUE
DO9210	COAD-US	0.317783	TRUE
DO9018	COAD-US	0.314944	TRUE
DO10443	COAD-US	0.584041	TRUE
DO10639	COAD-US	0.444404	TRUE
DO10132	COAD-US	0.489976	TRUE
DO10140	COAD-US	0.599761	TRUE
DO10373	COAD-US	0.738831	TRUE
DO10276	COAD-US	0.450414	TRUE
DO7977	COAD-US	0.518464	TRUE
DO7780	COAD-US	0.423485	TRUE
DO7810	COAD-US	0.751513	TRUE
DO7894	COAD-US	0.310125	TRUE
DO7918	COAD-US	0.605963	TRUE
DO8826	COAD-US	0.596595	TRUE
DO8634	COAD-US	0.533339	TRUE
DO9956	COAD-US	0.653958	TRUE
DO8786	COAD-US	0.540929	TRUE
DO9708	COAD-US	0.573985	TRUE
DO9756	COAD-US	0.621594	TRUE
DO8463	COAD-US	0.342799	TRUE
DO8514	COAD-US	0.499267	TRUE
DO8224	COAD-US	0.413046	TRUE
DO9538	COAD-US	0.359849	TRUE
DO8240	COAD-US	0.48175	TRUE
DO9602	COAD-US	0.337037	TRUE
DO9698	COAD-US	0.613141	TRUE
DO38591	STAD-US	0.356493	TRUE
DO38599	STAD-US	0.394485	TRUE
DO38551	STAD-US	0.466041	TRUE
DO38487	STAD-US	0.458551	TRUE
DO38483	STAD-US	0.664162	TRUE
DO38404	STAD-US	0.308259	TRUE
DO38727	STAD-US	0.712533	TRUE
DO38723	STAD-US	0.75287	TRUE
DO38711	STAD-US	0.550638	TRUE
DO38795	STAD-US	0.444288	TRUE
DO48044	STAD-US	0.474137	TRUE
DO38619	STAD-US	0.354655	TRUE
DO48032	STAD-US	0.549816	TRUE
DO48020	STAD-US	0.677776	TRUE
DO48009	STAD-US	0.589682	TRUE
DO47889	STAD-US	0.347803	TRUE
DO47873	STAD-US	0.610321	TRUE
DO47869	STAD-US	0.654464	TRUE
DO47867	STAD-US	0.337191	TRUE
DO47859	STAD-US	0.329045	TRUE
DO47849	STAD-US	0.721717	TRUE
DO47837	STAD-US	0.336628	TRUE
DO47833	STAD-US	0.528842	TRUE
DO47827	STAD-US	0.452158	TRUE
DO47829	STAD-US	0.509307	TRUE
DO47811	STAD-US	0.633276	TRUE
DO47819	STAD-US	0.528009	TRUE
DO47789	STAD-US	0.752129	TRUE
DO47777	STAD-US	0.478955	TRUE
DO47767	STAD-US	0.551811	TRUE
DO47757	STAD-US	0.592363	TRUE
DO47751	STAD-US	0.318281	TRUE
DO47745	STAD-US	0.594068	TRUE
DO47745	STAD-US	0.594068	TRUE
DO47739	STAD-US	0.373518	TRUE
DO47733	STAD-US	0.623485	TRUE
DO47721	STAD-US	0.431686	TRUE
DO47729	STAD-US	0.510191	TRUE
DO47717	STAD-US	0.442849	TRUE
DO47903	STAD-US	0.6191	TRUE
DO47981	STAD-US	0.565525	TRUE
DO47973	STAD-US	0.564186	TRUE
DO47925	STAD-US	0.430829	TRUE
DO38332	STAD-US	0.389083	TRUE
DO38288	STAD-US	0.57411	TRUE
DO38232	STAD-US	0.513962	TRUE
DO38202	STAD-US	0.385252	TRUE
DO38214	STAD-US	0.394985	TRUE
DO38823	STAD-US	0.475486	TRUE
DO38887	STAD-US	0.416227	TRUE
DO38567	STAD-US	0.601993	TRUE
DO38535	STAD-US	0.455667	TRUE
DO38499	STAD-US	0.332447	TRUE
DO38495	STAD-US	0.497528	TRUE
DO38419	STAD-US	0.352167	TRUE
DO38372	STAD-US	0.355905	TRUE
DO38380	STAD-US	0.702453	TRUE
DO38743	STAD-US	0.321067	TRUE
DO38707	STAD-US	0.336873	TRUE
DO38715	STAD-US	0.376677	TRUE
DO38627	STAD-US	0.712699	TRUE
DO38615	STAD-US	0.444595	TRUE
DO38683	STAD-US	0.437591	TRUE
DO38663	STAD-US	0.48974	TRUE
DO38348	STAD-US	0.379155	TRUE
DO38328	STAD-US	0.400145	TRUE
DO38320	STAD-US	0.41497	TRUE
DO38336	STAD-US	0.351856	TRUE
DO38292	STAD-US	0.304595	TRUE
