# Supplementary material for: Mutational signatures of DNA mismatch repair deficiency in C. elegans and human cancers
Source: HighWire-hosted journal article supplement (doi:10.1101/gr.226845.117), 2018-04-10
Supplement: Supplemental_Table_S4.docx [file Supplemental_Table_S4.docx]

**Supplemental Table S4.** POLE mutations in samples with high contribution of the 'POLE' signature. POLE mutation hotspots (amino acid changes which are present in more than 5 patients across the full cohort) are shown in bold. Zygosity information is not available for these samples.

| Sample | Mutations (amino acid change) | COSMIC annotation (FATHMM prediction) |
| --- | --- | --- |
| DO7783 (COAD) | P135S  P108S | Pathogenic (0.97 score)  - |
| DO7801 (COAD) | P259  **P286R**  P66R | -  Pathogenic (1.00 score)  - |
| DO8842 (COAD) | R1556W  R1529W  V191L  **V411L**  V384L  V29L | Pathogenic (0.96 score)  -  -  N/A  -  - |
| DO8264 (COAD) | R1344*  R1151*  R1371*  P259S  **P286S**  P66S  L39I  L1015I  L1235I  L1208I  L212I | -  -  Pathogenic (0.96 score)  -  Pathogenic (0.99 score)  -  -  -  Pathogenic (0.99 score)  -  - |
| DO10172 (COAD) | S77F  S270F  **S297F** | -  -  Pathogenic (1.00 score) |
| DO47769 (STAD) | V191L  **V411L**  V29L  Y2003C  Y1976C | -  N/A  -  Pathogenic (0.99 score)  - |
