# Supplementary material for: Mutational signatures of DNA mismatch repair deficiency in C. elegans and human cancers
Source: HighWire-hosted journal article supplement (doi:10.1101/gr.226845.117), 2018-04-10
Supplement: Supplemental_Table_S5.xlsx [file Supplemental_Table_S5.xlsx]

## Sheet: Legend
Supplementary Table 5.1. C. elegans mutational patterns with indels
Supplementary Table 5.2. C. elegans base substitution mutational patterns
Supplementary Table 5.3. C. elegans base substitution mutational patterns adjusted for human exome trinucleotide content
Supplementary Table 5.4. Mutational signatures including indels extracted from combined COAD+STAD dataset
Supplementary Table 5.5. Mutational signatures extracted from combined COAD+STAD dataset without indels

## Sheet: C.elegans mutational patterns w
Substitution.Type	Trinucleotide	Somatic.Mutation.Type	Wild.Type	mlh.1	pms.2	pole.4	pole.4.pms.2
C>A	ACA	A[C>A]A	0.020143	0.00414354	0.0014687	0.0195144	0.00148664
C>A	ACC	A[C>A]C	1.91611e-147	0.00109713	0.000977554	0	0.00143372
C>A	ACG	A[C>A]G	1.03169e-147	0.000731422	0.000488777	0	0.000375178
C>A	ACT	A[C>A]T	1.30028e-148	0.00438853	0.00317705	0	0.00414706
C>A	CCA	C[C>A]A	0.020143	0.00341212	0.00269065	0.000903505	0.00361
C>A	CCC	C[C>A]C	3.63359e-147	0.00402282	0.00342144	0	0.00535969
C>A	CCG	C[C>A]G	8.88761e-147	0.00365711	0.00317705	0	0.000730257
C>A	CCT	C[C>A]T	0.010322	0.0123086	0.0168268	0	1.36501e-12
C>A	GCA	G[C>A]A	0.010322	0.00280015	0.00167077	0	9.79687e-108
C>A	GCC	G[C>A]C	1.53982e-64	0.0032914	0.00268827	0.018611	0.00566158
C>A	GCG	G[C>A]G	1.13869e-147	0.000731422	0.000733166	0	0.00158781
C>A	GCT	G[C>A]T	2.50288e-148	0.00621709	0.00904238	0	0.0113826
C>A	TCA	T[C>A]A	0.0309661	0.00291477	0.00329377	2.3028e-63	0.0017888
C>A	TCC	T[C>A]C	3.08946e-59	0.00219427	0.00296183	0.0173024	9.4703e-84
C>A	TCG	T[C>A]G	9.87052e-48	0.00146284	0.00199421	0.0301467	0
C>A	TCT	T[C>A]T	5.77941e-63	0.00731422	0.00904238	0.037222	0.00149483
C>G	ACA	A[C>G]A	0.0136946	0.000564861	0	0	0.000579616
C>G	ACC	A[C>G]C	3.62493e-238	0	0.000488777	0	0.0017419
C>G	ACG	A[C>G]G	7.75798e-148	0.000365711	0.000199421	0	0
C>G	ACT	A[C>G]T	1.6703e-238	0	0.000244389	0	0.000529269
C>G	CCA	C[C>G]A	0	0	0	0	0
C>G	CCC	C[C>G]C	5.76601e-239	0	0.000244389	0	0.000529269
C>G	CCG	C[C>G]G	2.85069e-100	0	0.000199421	0.0150734	0
C>G	CCT	C[C>G]T	0	0	0	0	0
C>G	GCA	G[C>G]A	7.45052e-238	0	0.000488777	0	0.000375178
C>G	GCC	G[C>G]C	7.47082e-64	0.000365711	0.000488777	0.018611	0.000214798
C>G	GCG	G[C>G]G	1.34177e-98	0	0.000199421	0.0150734	0
C>G	GCT	G[C>G]T	0.00768418	0	0.00088523	0	6.69961e-05
C>G	TCA	T[C>G]A	0.0120624	0	9.94605e-05	0.0452291	0.000822867
C>G	TCC	T[C>G]C	0	0.000365711	0	0	0
C>G	TCG	T[C>G]G	0	0	0	0	0
C>G	TCT	T[C>G]T	0	0	0	0	0
C>T	ACA	A[C>T]A	0.0206441	0.0092574	0.00830556	0	0.0137409
C>T	ACC	A[C>T]C	2.19789e-62	0.00365711	0.00513216	0.055833	0.00721671
C>T	ACG	A[C>T]G	0.0309661	0.0105947	0.0069596	4.09316e-63	0.00836111
C>T	ACT	A[C>T]T	0.020143	0.00633781	0.00660086	0.0195144	0.0160181
C>T	CCA	C[C>T]A	0.0206066	0.00121221	0.000708255	0.0182472	1.46899e-26
C>T	CCC	C[C>T]C	2.22056e-146	0.00365711	0.00268827	0	0.00582196
C>T	CCG	C[C>T]G	3.32406e-147	0.00438853	0.00317705	0	0.00209698
C>T	CCT	C[C>T]T	2.49509e-147	0.0032914	0.00268827	0	0.00445524
C>T	GCA	G[C>T]A	0.010322	0.0137715	0.0142949	0	0.0196098
C>T	GCC	G[C>T]C	0.020143	0.0143835	0.0151545	0.0195144	0.0256588
C>T	GCG	G[C>T]G	1.41913e-146	0.00621709	0.011975	0	0.0197839
C>T	GCT	G[C>T]T	1.11599e-148	0.00841135	0.00977554	0	0.0150205
C>T	TCA	T[C>T]A	7.24114e-63	0.00219427	0.00317705	0.055833	0.00844944
C>T	TCC	T[C>T]C	1.02934e-63	0.00292569	0.00488777	0.018611	0.00837492
C>T	TCG	T[C>T]G	0.0309661	0.00145193	0.00231622	0	0.0085554
C>T	TCT	T[C>T]T	0.0201431	0.00377783	0.00244626	0.000903325	0.00786426
T>A	ATA	A[T>A]A	0.020143	0.000486431	0.000246761	0.0195144	0.00362381
T>A	ATC	A[T>A]C	2.33093e-146	0.000365711	0.00146633	0	0.00317561
T>A	ATG	A[T>A]G	2.49366e-148	0.000731422	0.000733166	0	0.000221087
T>A	ATT	A[T>A]T	0.15483	0.0262766	0.0206235	4.76492e-11	0.00700779
T>A	CTA	C[T>A]A	7.60217e-50	0.000365711	0.000398842	0.0150734	0
T>A	CTC	C[T>A]C	0.010322	0.00097159	0.000609148	0	0.00158781
T>A	CTG	C[T>A]G	0	0	0	0	0.00068336
T>A	CTT	C[T>A]T	0	0	0	0	0
T>A	GTA	G[T>A]A	1.72272e-244	0	0	0.0150734	0
T>A	GTC	G[T>A]C	3.9105e-148	0.00146284	0.000244389	0	0.00121263
T>A	GTG	G[T>A]G	3.83174e-238	0	0.000244389	0	0.00189599
T>A	GTT	G[T>A]T	0.0201433	0.000852138	0.00195748	0.000902857	0.00133884
T>A	TTA	T[T>A]A	0.0825762	0.00338419	0.00291807	2.93017e-105	0.0016347
T>A	TTC	T[T>A]C	3.07365e-62	0.000365711	0.00071604	0.0363179	1.35757e-27
T>A	TTG	T[T>A]G	1.30121e-48	0.000365711	0.000199421	0.0150734	0
T>A	TTT	T[T>A]T	4.19883e-59	0.00292569	0.0020677	0.0698123	6.43528e-72
T>C	ATA	A[T>C]A	0.020143	0.00962921	0.00635648	0.0195144	0.0277893
T>C	ATC	A[T>C]C	0.0206441	0.00742885	0.00732801	0	0.0143573
T>C	ATG	A[T>C]G	8.63465e-63	0.0102399	0.0102643	0.018611	0.033686
T>C	ATT	A[T>C]T	2.70792e-145	0.00292569	0.00610971	0	0.0227988
T>C	CTA	C[T>C]A	1.60097e-146	0.0032914	0.00342144	0	0.00740977
T>C	CTC	C[T>C]C	0.010322	0.00609154	0.00476375	0	0.00443514
T>C	CTG	C[T>C]G	4.83477e-146	0.00511995	0.00610971	0	0.00981493
T>C	CTT	C[T>C]T	2.62128e-63	0.00841135	0.00708727	0.018611	0.00630474
T>C	GTA	G[T>C]A	6.48932e-147	0.00914278	0.00757605	0	0.0287078
T>C	GTC	G[T>C]C	0.010322	0.00755439	0.00916275	0	0.0221623
T>C	GTG	G[T>C]G	4.18745e-146	0.0106056	0.00830921	0	0.0350791
T>C	GTT	G[T>C]T	7.98452e-146	0.0106056	0.00757605	0	0.0191408
T>C	TTA	T[T>C]A	6.5523e-64	0.00292569	0.00439899	0.018611	0.0428511
T>C	TTC	T[T>C]C	0.0201436	0.00780064	0.00635647	0.000902322	0.0327332
T>C	TTG	T[T>C]G	1.18799e-146	0.00585138	0.00562094	0	0.0367741
T>C	TTT	T[T>C]T	0.020143	0.0059721	0.00611209	0.0195144	0.044344
T>G	ATA	A[T>G]A	4.89263e-64	0.000365711	0.000244389	0.018611	0.000368889
T>G	ATC	A[T>G]C	6.24458e-148	0.00146284	0.00268827	0	0.00445524
T>G	ATG	A[T>G]G	2.0137e-147	0.00109713	0.000977554	0	0.000750356
T>G	ATT	A[T>G]T	2.61238e-62	0.00767993	0.00537655	0.055833	0.00842934
T>G	CTA	C[T>G]A	0.00684729	0.00101385	0	0	0.00131485
T>G	CTC	C[T>G]C	1.849e-148	0.00182856	0.00244389	0	0.00050917
T>G	CTG	C[T>G]G	1.80396e-63	0.00146284	0.00391022	0.018611	0.00147432
T>G	CTT	C[T>G]T	4.69402e-147	0.00694851	0.0063541	0	0.00282723
T>G	GTA	G[T>G]A	0	0	0	0	0
T>G	GTC	G[T>G]C	6.26188e-63	0.00219427	0.0021995	0.018611	0.00323632
T>G	GTG	G[T>G]G	0.010322	0.000605879	0.00109792	0	0.00196299
T>G	GTT	G[T>G]T	0.010322	0.00280015	0.00842958	0	0.000757056
T>G	TTA	T[T>G]A	0.010322	0.000240168	7.5403e-05	0	0
T>G	TTC	T[T>G]C	9.30767e-148	0.00109713	0.00171072	0	0.000288083
T>G	TTG	T[T>G]G	0.020143	0.00341212	0.0014687	0.0381254	0.000642897
T>G	TTT	T[T>G]T	0.010322	0.00609154	0.00403059	0	0.00421405
INS	A	INS_A	0.060429	0.110075	0.133443	0.0213213	0.0751266
INS	C	INS_C	2.56648e-64	0.00109713	0.00244389	0.018611	0.00649903
INS	G	INS_G	4.22746e-63	0.00255998	0.00244389	0.018611	0.00376559
INS	T	INS_T	0.0805719	0.135796	0.130757	0.0222248	0.067776
DEL	A	DEL_A	0.040286	0.190045	0.18183	0.0390289	0.0924532
DEL	C	DEL_C	0.020143	0.00304641	0.00391259	0.0381254	0.00115207
DEL	G	DEL_G	5.30262e-63	0.00219427	0.00293266	0.018611	0.010291
DEL	T	DEL_T	0.0412881	0.206856	0.19477	3.02593e-107	0.0859895

## Sheet: C.elegans mutational patterns
Substitution.Type	Trinucleotide	Somatic.Mutation.Type	Wild.Type	mlh.1	pms.2	pole.4	pole.4.pms.2
C>A	ACA	A[C>A]A	0.0265991	0.0118955	0.0042269	0.0236979	0.00226295
C>A	ACC	A[C>A]C	2.53024e-147	0.0031497	0.00281338	0	0.00218239
C>A	ACG	A[C>A]G	1.36236e-147	0.0020998	0.00140669	0	0.000571093
C>A	ACT	A[C>A]T	1.71703e-148	0.0125988	0.00914349	0	0.00631262
C>A	CCA	C[C>A]A	0.026599	0.00979567	0.00774363	0.0010972	0.00549512
C>A	CCC	C[C>A]C	4.79821e-147	0.0115489	0.00984683	0	0.00815848
C>A	CCG	C[C>A]G	1.17362e-146	0.010499	0.00914349	0	0.00111159
C>A	CCT	C[C>A]T	0.0136304	0.0353362	0.0484271	0	2.07781e-12
C>A	GCA	G[C>A]A	0.0136304	0.00803879	0.00480845	0	1.49127e-107
C>A	GCC	G[C>A]C	2.03335e-64	0.0094491	0.0077368	0.0226008	0.00861801
C>A	GCG	G[C>A]G	1.50366e-147	0.0020998	0.00211004	0	0.00241695
C>A	GCT	G[C>A]T	3.30508e-148	0.0178483	0.0260238	0	0.0173266
C>A	TCA	T[C>A]A	0.0408911	0.00836786	0.00947942	2.79648e-63	0.00272289
C>A	TCC	T[C>A]C	4.07967e-59	0.0062994	0.00852408	0.0210116	1.44156e-83
C>A	TCG	T[C>A]G	1.30341e-47	0.0041996	0.0057393	0.0366096	0
C>A	TCT	T[C>A]T	7.63179e-63	0.020998	0.0260238	0.0452016	0.00227542
C>G	ACA	A[C>G]A	0.0180838	0.00162163	0	0	0.000882287
C>G	ACC	A[C>G]C	4.78676e-238	0	0.00140669	0	0.0026515
C>G	ACG	A[C>G]G	1.02445e-147	0.0010499	0.00057393	0	0
C>G	ACT	A[C>G]T	2.20566e-238	0	0.000703345	0	0.00080565
C>G	CCA	C[C>G]A	0	0	0	0	0
C>G	CCC	C[C>G]C	7.61408e-239	0	0.000703345	0	0.00080565
C>G	CCG	C[C>G]G	3.76438e-100	0	0.00057393	0.0183048	0
C>G	CCT	C[C>G]T	0	0	0	0	0
C>G	GCA	G[C>G]A	9.8385e-238	0	0.00140669	0	0.000571093
C>G	GCC	G[C>G]C	9.86531e-64	0.0010499	0.00140669	0.0226008	0.000326963
C>G	GCG	G[C>G]G	1.77182e-98	0	0.00057393	0.0183048	0
C>G	GCT	G[C>G]T	0.010147	0	0.00254767	0	0.000101981
C>G	TCA	T[C>G]A	0.0159285	0	0.000286245	0.0549252	0.00125256
C>G	TCC	T[C>G]C	0	0.0010499	0	0	0
C>G	TCG	T[C>G]G	0	0	0	0	0
C>G	TCT	T[C>G]T	0	0	0	0	0
C>T	ACA	A[C>T]A	0.0272607	0.0265766	0.0239032	0	0.0209163
C>T	ACC	A[C>T]C	2.90234e-62	0.010499	0.0147703	0.0678024	0.0109852
C>T	ACG	A[C>T]G	0.0408911	0.0304158	0.0200296	4.97065e-63	0.0127272
C>T	ACT	A[C>T]T	0.0265991	0.0181949	0.0189972	0.0236979	0.0243826
C>T	CCA	C[C>T]A	0.0272112	0.00348008	0.00203834	0.022159	2.23609e-26
C>T	CCC	C[C>T]C	2.93227e-146	0.010499	0.0077368	0	0.00886214
C>T	CCG	C[C>T]G	4.38946e-147	0.0125988	0.00914349	0	0.003192
C>T	CCT	C[C>T]T	3.29479e-147	0.0094491	0.0077368	0	0.00678173
C>T	GCA	G[C>T]A	0.0136304	0.0395358	0.0411405	0	0.0298498
C>T	GCC	G[C>T]C	0.0265991	0.0412927	0.0436142	0.0236979	0.0390577
C>T	GCG	G[C>T]G	1.87398e-146	0.0178483	0.0344639	0	0.030115
C>T	GCT	G[C>T]T	1.47368e-148	0.0241477	0.0281338	0	0.0228641
C>T	TCA	T[C>T]A	9.56201e-63	0.0062994	0.00914349	0.0678024	0.0128617
C>T	TCC	T[C>T]C	1.35925e-63	0.0083992	0.0140669	0.0226008	0.0127482
C>T	TCG	T[C>T]G	0.0408911	0.00416826	0.00666603	0	0.013023
C>T	TCT	T[C>T]T	0.0265991	0.0108456	0.00704028	0.00109698	0.0119709
T>A	ATA	A[T>A]A	0.0265991	0.00139647	0.000710174	0.0236979	0.00551614
T>A	ATC	A[T>A]C	3.07802e-146	0.0010499	0.00422007	0	0.0048339
T>A	ATG	A[T>A]G	3.29291e-148	0.0020998	0.00211004	0	0.000336537
T>A	ATT	A[T>A]T	0.204455	0.0754361	0.0593539	5.78642e-11	0.0106672
T>A	CTA	C[T>A]A	1.00388e-49	0.0010499	0.00114786	0.0183048	0
T>A	CTC	C[T>A]C	0.0136304	0.00278929	0.00175311	0	0.00241695
T>A	CTG	C[T>A]G	0	0	0	0	0.00104021
T>A	CTT	C[T>A]T	0	0	0	0	0
T>A	GTA	G[T>A]A	2.27487e-244	0	0	0.0183048	0
T>A	GTC	G[T>A]C	5.16386e-148	0.0041996	0.000703345	0	0.00184586
T>A	GTG	G[T>A]G	5.05986e-238	0	0.000703345	0	0.00288606
T>A	GTT	G[T>A]T	0.0265995	0.00244636	0.00563358	0.00109641	0.00203797
T>A	TTA	T[T>A]A	0.109043	0.00971549	0.00839815	3.55834e-105	0.00248834
T>A	TTC	T[T>A]C	4.0588e-62	0.0010499	0.00206075	0.0441037	2.06648e-27
T>A	TTG	T[T>A]G	1.71826e-48	0.0010499	0.00057393	0.0183048	0
T>A	TTT	T[T>A]T	5.5446e-59	0.0083992	0.00595079	0.0847786	9.79573e-72
T>C	ATA	A[T>C]A	0.0265991	0.027644	0.0182938	0.0236979	0.0423007
T>C	ATC	A[T>C]C	0.0272607	0.0213271	0.0210899	0	0.0218545
T>C	ATG	A[T>C]G	1.14022e-62	0.0293972	0.0295405	0.0226008	0.0512766
T>C	ATT	A[T>C]T	3.57584e-145	0.0083992	0.0175836	0	0.0347041
T>C	CTA	C[T>C]A	2.1141e-146	0.0094491	0.00984683	0	0.0112791
T>C	CTC	C[T>C]C	0.0136304	0.0174879	0.01371	0	0.00675114
T>C	CTG	C[T>C]G	6.38437e-146	0.0146986	0.0175836	0	0.0149402
T>C	CTT	C[T>C]T	3.46143e-63	0.0241477	0.020397	0.0226008	0.00959703
T>C	GTA	G[T>C]A	8.56922e-147	0.0262475	0.0218037	0	0.0436988
T>C	GTC	G[T>C]C	0.0136304	0.0216875	0.0263702	0	0.0337353
T>C	GTG	G[T>C]G	5.52957e-146	0.0304471	0.0239137	0	0.0533972
T>C	GTT	G[T>C]T	1.05437e-145	0.0304471	0.0218037	0	0.029136
T>C	TTA	T[T>C]A	8.65239e-64	0.0083992	0.0126602	0.0226008	0.0652276
T>C	TTC	T[T>C]C	0.0265999	0.0223945	0.0182938	0.00109576	0.0498263
T>C	TTG	T[T>C]G	1.56875e-146	0.0167984	0.0161769	0	0.0559773
T>C	TTT	T[T>C]T	0.0265991	0.017145	0.0175905	0.0236979	0.0675002
T>G	ATA	A[T>G]A	6.46078e-64	0.0010499	0.000703345	0.0226008	0.00056152
T>G	ATC	A[T>G]C	8.24605e-148	0.0041996	0.0077368	0	0.00678173
T>G	ATG	A[T>G]G	2.65911e-147	0.0031497	0.00281338	0	0.00114219
T>G	ATT	A[T>G]T	3.44968e-62	0.0220479	0.0154736	0.0678024	0.0128311
T>G	CTA	C[T>G]A	0.00904192	0.00291061	0	0	0.00200145
T>G	CTC	C[T>G]C	2.44163e-148	0.0052495	0.00703345	0	0.000775055
T>G	CTG	C[T>G]G	2.38215e-63	0.0041996	0.0112535	0.0226008	0.00224421
T>G	CTT	C[T>G]T	6.19851e-147	0.0199481	0.018287	0	0.0043036
T>G	GTA	G[T>G]A	0	0	0	0	0
T>G	GTC	G[T>G]C	8.26889e-63	0.0062994	0.00633011	0.0226008	0.0049263
T>G	GTG	G[T>G]G	0.0136304	0.00173939	0.00315981	0	0.00298804
T>G	GTT	G[T>G]T	0.0136304	0.00803879	0.0242602	0	0.00115238
T>G	TTA	T[T>G]A	0.0136304	0.000689487	0.000217008	0	0
T>G	TTC	T[T>G]C	1.22909e-147	0.0031497	0.00492342	0	0.000438518
T>G	TTG	T[T>G]G	0.0265991	0.00979567	0.0042269	0.0462987	0.000978613
T>G	TTT	T[T>G]T	0.0136304	0.0174879	0.0115999	0	0.0064146

## Sheet: C.elegans patterns adjusted for
Substitution.Type	Trinucleotide	Somatic.Mutation.Type	Wild.Type	mlh.1	pms.2	pole.4	pole.4.pms.2
C>A	ACA	A[C>A]A	0.0308796	0.00951652	0.00322182	0.0225539	0.00203437
C>A	ACC	A[C>A]C	5.09592e-147	0.0043714	0.00372017	0	0.00340364
C>A	ACG	A[C>A]G	1.0747e-147	0.00114146	0.00072856	0	0.00034886
C>A	ACT	A[C>A]T	1.863e-148	0.00942006	0.00651358	0	0.00530389
C>A	CCA	C[C>A]A	0.0571154	0.0144948	0.0109171	0.00193143	0.00913725
C>A	CCC	C[C>A]C	1.93079e-146	0.0320249	0.0260152	0	0.0254224
C>A	CCG	C[C>A]G	1.76956e-146	0.0109088	0.00905158	0	0.00129788
C>A	CCT	C[C>A]T	0.0425408	0.0759991	0.099234	0	5.02175e-12
C>A	GCA	G[C>A]A	0.0254094	0.0103269	0.00588527	0	2.15276e-107
C>A	GCC	G[C>A]C	6.6403e-64	0.0212646	0.0165886	0.0605071	0.0217938
C>A	GCG	G[C>A]G	2.39204e-147	0.00230191	0.00220385	0	0.0029774
C>A	GCT	G[C>A]T	7.37415e-148	0.0274421	0.0381219	0	0.029936
C>A	TCA	T[C>A]A	0.0412539	0.00581757	0.00627902	2.31288e-63	0.00212724
C>A	TCC	T[C>A]C	7.75848e-59	0.00825547	0.0106432	0.0327581	2.12293e-83
C>A	TCG	T[C>A]G	7.39285e-48	0.00164145	0.00213728	0.0170228	0
C>A	TCT	T[C>A]T	1.02656e-62	0.0194637	0.0229827	0.0498446	0.00237012
C>G	ACA	A[C>G]A	0.0209941	0.00129732	0	0	0.000793169
C>G	ACC	A[C>G]C	9.64056e-238	0	0.00186009	0	0.00413527
C>G	ACG	A[C>G]G	8.08136e-148	0.000570731	0.000297253	0	0
C>G	ACT	A[C>G]T	2.39316e-238	0	0.000501045	0	0.00067691
C>G	CCA	C[C>G]A	0	0	0	0	0
C>G	CCC	C[C>G]C	3.0639e-238	0	0.00185823	0	0.00251046
C>G	CCG	C[C>G]G	5.67586e-100	0	0.000568161	0.0226261	0
C>G	CCT	C[C>G]T	0	0	0	0	0
C>G	GCA	G[C>G]A	1.83407e-237	0	0.00172171	0	0.000824414
C>G	GCC	G[C>G]C	3.22171e-63	0.00236273	0.00301612	0.0605071	0.000826848
C>G	GCG	G[C>G]G	2.81864e-98	0	0.000599448	0.0238721	0
C>G	GCT	G[C>G]T	0.0226397	0	0.00373205	0	0.000176198
C>G	TCA	T[C>G]A	0.0160698	0	0.000189604	0.045427	0.000978558
C>G	TCC	T[C>G]C	0	0.00137591	0	0	0
C>G	TCG	T[C>G]G	0	0	0	0	0
C>G	TCT	T[C>G]T	0	0	0	0	0
C>T	ACA	A[C>T]A	0.0316478	0.0212616	0.0182195	0	0.0188036
C>T	ACC	A[C>T]C	5.84534e-62	0.0145713	0.0195309	0.111947	0.0171325
C>T	ACG	A[C>T]G	0.0322568	0.0165342	0.0103738	3.2145e-63	0.00777459
C>T	ACT	A[C>T]T	0.0288603	0.0136042	0.0135331	0.021079	0.0204864
C>T	CCA	C[C>T]A	0.0584299	0.00514953	0.00287368	0.0390071	3.71815e-26
C>T	CCC	C[C>T]C	1.17994e-145	0.0291136	0.0204405	0	0.0276151
C>T	CCG	C[C>T]G	6.61835e-147	0.0130906	0.00905158	0	0.00372694
C>T	CCT	C[C>T]T	1.02832e-146	0.0203226	0.0158538	0	0.0163904
C>T	GCA	G[C>T]A	0.0254094	0.0507889	0.0503536	0	0.0430903
C>T	GCC	G[C>T]C	0.0868645	0.0929265	0.0935143	0.0634443	0.0987718
C>T	GCG	G[C>T]G	2.98115e-146	0.0195662	0.0359963	0	0.0370982
C>T	GCT	G[C>T]T	3.28801e-148	0.0371276	0.0412128	0	0.0395035
C>T	TCA	T[C>T]A	9.64686e-63	0.00437952	0.00605651	0.0560774	0.0100481
C>T	TCC	T[C>T]C	2.58495e-63	0.0110073	0.017564	0.0352356	0.0187738
C>T	TCG	T[C>T]G	0.023193	0.0016292	0.00248239	0	0.00571992
C>T	TCT	T[C>T]T	0.0357788	0.0100531	0.00621758	0.00120966	0.0124691
T>A	ATA	A[T>A]A	0.0156284	0.000565418	0.000273959	0.0114147	0.00250977
T>A	ATC	A[T>A]C	2.9204e-146	0.000686451	0.00262884	0	0.00355156
T>A	ATG	A[T>A]G	3.90679e-148	0.00171675	0.00164363	0	0.000309188
T>A	ATT	A[T>A]T	0.0893789	0.0227251	0.0170357	2.07373e-11	0.00361108
T>A	CTA	C[T>A]A	9.20345e-50	0.000663299	0.000690929	0.0137576	0
T>A	CTC	C[T>A]C	0.0278946	0.00393365	0.00235557	0	0.00383028
T>A	CTG	C[T>A]G	0	0	0	0	0.00224426
T>A	CTT	C[T>A]T	0	0	0	0	0
T>A	GTA	G[T>A]A	2.26623e-244	0	0	0.0149492	0
T>A	GTC	G[T>A]C	8.60268e-148	0.00482123	0.00076931	0	0.00238126
T>A	GTG	G[T>A]G	9.55057e-238	0	0.000871632	0	0.00421839
T>A	GTT	G[T>A]T	0.0205186	0.00130042	0.0028532	0.000693353	0.00121737
T>A	TTA	T[T>A]A	0.0637331	0.00391312	0.00322274	1.70499e-105	0.00112623
T>A	TTC	T[T>A]C	3.38285e-62	0.000603008	0.00112767	0.0301346	1.33373e-27
T>A	TTG	T[T>A]G	1.2941e-48	0.0005449	0.000283799	0.0113018	0
T>A	TTT	T[T>A]T	2.30269e-59	0.00240377	0.0016226	0.028864	3.1503e-72
T>C	ATA	A[T>C]A	0.0156284	0.0111928	0.00705709	0.0114147	0.0192462
T>C	ATC	A[T>C]C	0.0258648	0.0139442	0.0131377	0	0.0160569
T>C	ATG	A[T>C]G	1.35278e-62	0.0240345	0.0230108	0.0219821	0.0471096
T>C	ATT	A[T>C]T	1.5632e-145	0.00253026	0.00504683	0	0.0117481
T>C	CTA	C[T>C]A	1.93819e-146	0.00596969	0.00592709	0	0.00800748
T>C	CTC	C[T>C]C	0.0278946	0.0246627	0.0184214	0	0.0106989
T>C	CTG	C[T>C]G	1.77878e-145	0.0282208	0.0321651	0	0.0322337
T>C	CTT	C[T>C]T	4.58308e-63	0.0220327	0.0177314	0.024532	0.00983988
T>C	GTA	G[T>C]A	8.53665e-147	0.0180187	0.014261	0	0.0337106
T>C	GTC	G[T>C]C	0.0227074	0.0248977	0.0288434	0	0.0435205
T>C	GTG	G[T>C]G	1.04372e-145	0.0396029	0.0296355	0	0.0780477
T>C	GTT	G[T>C]T	8.13329e-146	0.016185	0.0110428	0	0.0174042
T>C	TTA	T[T>C]A	5.05712e-64	0.00338295	0.00485828	0.0108292	0.0295223
T>C	TTC	T[T>C]C	0.0221699	0.0128622	0.0100106	0.000748698	0.0321583
T>C	TTG	T[T>C]G	1.1815e-146	0.00871839	0.00799923	0	0.0326468
T>C	TTT	T[T>C]T	0.0110466	0.00490672	0.0047964	0.00806828	0.021708
T>G	ATA	A[T>G]A	3.79606e-64	0.000425095	0.000271325	0.0108862	0.000255484
T>G	ATC	A[T>G]C	7.82379e-148	0.00274581	0.00481955	0	0.00498267
T>G	ATG	A[T>G]G	3.15483e-147	0.00257513	0.0021915	0	0.00104937
T>G	ATT	A[T>G]T	1.50805e-62	0.00664193	0.00444121	0.024299	0.0043436
T>G	CTA	C[T>G]A	0.00828956	0.00183885	0	0	0.00142091
T>G	CTC	C[T>G]C	4.9968e-148	0.00740322	0.00945049	0	0.00122827
T>G	CTG	C[T>G]G	6.63701e-63	0.00806309	0.0205857	0.0516218	0.0048419
T>G	CTT	C[T>G]T	8.2071e-147	0.018201	0.0158971	0	0.0044125
T>G	GTA	G[T>G]A	0	0	0	0	0
T>G	GTC	G[T>G]C	1.37755e-62	0.00723184	0.00692379	0.0308666	0.00635523
T>G	GTG	G[T>G]G	0.0257275	0.00226244	0.00391584	0	0.00436745
T>G	GTT	G[T>G]T	0.0105143	0.00427323	0.0122869	0	0.000688371
T>G	TTA	T[T>G]A	0.00796663	0.000277705	8.32755e-05	0	0
T>G	TTC	T[T>G]C	1.0244e-147	0.00180903	0.00269417	0	0.000283024
T>G	TTG	T[T>G]G	0.0200329	0.00508397	0.00209013	0.028586	0.000570741
T>G	TTT	T[T>G]T	0.00566072	0.00500486	0.00316296	0	0.00206293

## Sheet: COADSTAD signatures with indels
Substitution.Type	Trinucleotide	Somatic.Mutation.Type	Clock.1	Clock.2	POLE	X17.like	MMR.1	MMR.2	MMR.3	SNP
C>A	ACA	A[C>A]A	0.00209881	0.0187645	0.000617279	0.000462412	0.000517031	2.22918e-21	6.74197e-09	0.00258827
C>A	ACC	A[C>A]C	0.00163932	0.021707	0.00169455	3.97734e-21	0.0013471	0.000349195	0.000471935	0.00520562
C>A	ACG	A[C>A]G	5.91489e-05	0.00646634	0.000135267	0.000574827	0.00028487	4.77716e-05	4.97628e-05	0.00442753
C>A	ACT	A[C>A]T	1.47992e-11	0.0129246	0.00724978	3.97734e-21	0.00233733	0.00246632	0.000643796	0.00096269
C>A	CCA	C[C>A]A	0.00504199	0.0184048	0.00214082	0.000257313	0.0099982	0.00276465	0.00287428	0.00653325
C>A	CCC	C[C>A]C	0.000383125	0.0113321	0.00163844	0.00107559	0.0285654	0.00301867	0.00307195	0.00649444
C>A	CCG	C[C>A]G	0.00443246	0.00327222	0.000633037	3.97734e-21	0.0107395	0.00292147	0.00336195	0.0139898
C>A	CCT	C[C>A]T	0.00471611	0.00573764	0.0122048	3.97734e-21	0.0667574	0.0141713	0.0223379	0.0038704
C>A	GCA	G[C>A]A	0.00407189	0.0309513	0.000770092	0.00121892	0.000766134	0.00235539	2.42649e-21	0.00639446
C>A	GCC	G[C>A]C	1.22187e-07	0.018664	0.00242787	0.000534631	0.00427241	0.00720457	0.00294592	0.00560012
C>A	GCG	G[C>A]G	0.00108374	0.00738975	5.73178e-05	3.97734e-21	0.00149674	0.00177848	0.000551019	0.0160693
C>A	GCT	G[C>A]T	4.78212e-09	0.0153594	0.0068292	3.97734e-21	0.00688884	0.0253614	0.00675746	0.00367386
C>A	TCA	T[C>A]A	0.0019459	0.0201132	0.0346091	0.00108494	0.000105643	0.000456744	2.42649e-21	0.000348675
C>A	TCC	T[C>A]C	0.00280479	0.0238081	0.00615023	3.62351e-18	0.00345686	0.00179945	3.1532e-19	0.00391659
C>A	TCG	T[C>A]G	0.0006388	0.00753185	0.00320199	3.16704e-14	0.000575051	0.00172762	2.42649e-21	0.00425232
C>A	TCT	T[C>A]T	4.78295e-10	3.00041e-21	0.231885	3.97734e-21	0.00796054	0.00273119	0.000297211	2.88303e-21
C>G	ACA	A[C>G]A	0.000222601	0.00885243	0.000406524	0.000248133	0.000455062	0.000494379	0.000323015	0.00548501
C>G	ACC	A[C>G]C	0.000565628	0.0109104	0.000415432	0.00114082	0.0010162	6.25875e-05	0.00100352	0.00367625
C>G	ACG	A[C>G]G	1.8293e-21	0.00390971	4.51821e-05	3.97734e-21	7.6562e-05	2.22918e-21	2.42649e-21	0.00688396
C>G	ACT	A[C>G]T	0.000506966	0.0131796	2.66287e-21	3.97734e-21	0.00133451	2.96304e-10	0.00102072	0.00444694
C>G	CCA	C[C>G]A	1.8293e-21	0.0121053	2.2391e-05	0.000436348	1.80492e-21	6.34379e-12	1.93241e-05	0.00490007
C>G	CCC	C[C>G]C	1.8293e-21	0.00578148	6.42855e-05	0.000472643	1.80492e-21	2.22918e-21	2.42649e-21	0.00938905
C>G	CCG	C[C>G]G	1.8293e-21	0.00215455	2.66287e-21	0.000525727	1.80492e-21	0.000156402	2.42649e-21	0.0137073
C>G	CCT	C[C>G]T	0.000111548	0.0135929	2.66287e-21	3.97734e-21	0.000245086	0.000121182	0.000218621	0.00416048
C>G	GCA	G[C>G]A	2.74299e-12	0.00630168	6.75171e-05	0.000936097	0.000509416	0.000130713	0.000397036	0.00579363
C>G	GCC	G[C>G]C	0.00160597	0.00762158	1.12575e-05	3.97734e-21	0.0023232	2.22918e-21	0.00304578	0.00860605
C>G	GCG	G[C>G]G	1.8293e-21	0.0010681	2.66287e-21	0.000114343	0.000202168	2.22918e-21	2.42649e-21	0.00816873
C>G	GCT	G[C>G]T	1.8293e-21	0.00974502	0.000361635	3.97734e-21	0.000885266	0.0004504	0.000272574	0.00642313
C>G	TCA	T[C>G]A	1.8293e-21	0.0261931	2.66287e-21	0.000513237	1.80492e-21	2.22918e-21	2.42649e-21	0.000569417
C>G	TCC	T[C>G]C	0.00015413	0.0182758	2.66287e-21	0.000811406	0.000355724	6.49937e-05	0.000106061	0.00727216
C>G	TCG	T[C>G]G	1.8293e-21	0.00537846	5.16805e-05	0.000693187	1.80492e-21	7.7434e-05	1.37867e-05	0.0049606
C>G	TCT	T[C>G]T	1.8293e-21	0.0412964	0.000156695	0.00164645	2.28058e-13	0.000244674	0.000312212	0.00454724
C>T	ACA	A[C>T]A	0.0106356	0.0157209	0.000436776	0.00604545	0.0167821	0.00663197	0.00750554	0.0197131
C>T	ACC	A[C>T]C	0.00910557	0.0208602	0.00325687	0.00189323	0.00855973	0.0128119	0.0114509	0.0140737
C>T	ACG	A[C>T]G	0.278998	0.0235832	0.00987076	0.00568415	0.0245544	0.0626855	0.0429389	0.068476
C>T	ACT	A[C>T]T	0.00466371	0.0168372	0.00488634	0.00244388	0.0076122	0.00305529	0.0049646	0.0183378
C>T	CCA	C[C>T]A	0.00707935	0.0355501	0.000874963	0.00736035	0.00567813	0.00296648	0.00338465	0.0148277
C>T	CCC	C[C>T]C	0.00603349	0.0264987	0.00212914	0.00308496	0.00645716	0.00747984	0.0103415	0.0246583
C>T	CCG	C[C>T]G	0.267163	0.00923592	0.00243217	0.010467	0.0329141	0.0460912	0.042247	0.104472
C>T	CCT	C[C>T]T	0.00568229	0.0340854	0.00371035	0.00442887	0.005391	0.00711604	0.0063057	0.0283288
C>T	GCA	G[C>T]A	0.00757475	0.0143232	0.00122283	0.00198206	0.0414194	0.0344656	0.0200351	0.0142487
C>T	GCC	G[C>T]C	7.39631e-08	0.00353887	0.0175148	0.00280921	0.0486213	0.124821	0.0472616	0.0182377
C>T	GCG	G[C>T]G	0.197846	1.02316e-12	0.0396387	0.00929821	0.0665965	0.431717	0.0263248	0.0356657
C>T	GCT	G[C>T]T	0.0021792	0.00674587	0.0248913	0.00151218	0.0261212	0.0734461	0.02696	0.0280682
C>T	TCA	T[C>T]A	0.00303813	0.0594766	0.00374714	0.00894943	0.00267111	0.00492355	0.00722011	0.00415881
C>T	TCC	T[C>T]C	0.00419554	0.0490279	0.0199776	0.00886983	0.00342497	0.0112316	0.00923896	0.0127749
C>T	TCG	T[C>T]G	0.125812	0.00994796	0.273954	0.00229605	0.0125351	0.0212054	0.0180737	0.0287095
C>T	TCT	T[C>T]T	0.00259795	0.0410506	0.0398602	0.00675482	0.001449	0.00452227	0.00635671	0.00913291
T>A	ATA	A[T>A]A	0.000171629	0.00587981	0.000179076	0.000567879	1.80492e-21	0.000129735	0.00540388	2.88303e-21
T>A	ATC	A[T>A]C	1.8293e-21	0.00731975	5.17912e-05	0.00102473	1.80492e-21	0.0048228	0.0182787	2.88303e-21
T>A	ATG	A[T>A]G	0.000182684	0.0101021	9.30545e-05	0.00124532	0.000126611	0.000441371	0.00165116	0.00274001
T>A	ATT	A[T>A]T	0.00104764	0.00831888	0.00132846	0.00242515	0.00223273	0.00216529	0.0055588	2.88303e-21
T>A	CTA	C[T>A]A	0.000235715	0.00565082	5.81505e-05	0.000852188	0.000191183	2.22918e-21	0.000645677	2.88303e-21
T>A	CTC	C[T>A]C	1.8293e-21	0.00839315	0.000136326	0.0124605	0.00233317	0.00072749	0.00360102	0.00275036
T>A	CTG	C[T>A]G	0.0013078	0.0150411	0.000247635	0.00733694	2.07875e-06	7.71675e-05	0.00175616	0.00742421
T>A	CTT	C[T>A]T	1.8293e-21	0.0135332	2.66287e-21	0.0376811	0.00168321	2.22918e-21	0.000247969	0.000346479
T>A	GTA	G[T>A]A	2.39609e-15	0.00430971	0.000108543	3.97734e-21	0.000190437	0.000445489	0.00312455	0.000165653
T>A	GTC	G[T>A]C	1.8293e-21	0.00489014	2.66287e-21	0.00311893	0.000349004	0.00402246	0.011558	2.88303e-21
T>A	GTG	G[T>A]G	1.8293e-21	0.00648822	2.66287e-21	0.00182813	0.00131424	0.000105469	0.00152398	0.00274722
T>A	GTT	G[T>A]T	1.8293e-21	0.00626236	2.66287e-21	0.00693895	0.000767243	0.00139904	0.0031181	2.88303e-21
T>A	TTA	T[T>A]A	1.8293e-21	0.00596205	0.00015424	0.000920442	0.000504132	0.000357113	0.00175967	2.88303e-21
T>A	TTC	T[T>A]C	0.000342643	0.00882613	0.000309294	0.00301504	4.84348e-07	0.0002286	0.00321267	1.65416e-08
T>A	TTG	T[T>A]G	0.000224379	0.00480366	2.66287e-21	0.00113274	7.14295e-05	0.000361835	0.000833185	0.000417292
T>A	TTT	T[T>A]T	0.000527294	0.0102007	0.00205628	0.00501517	6.31809e-05	7.60105e-05	0.000342046	6.00913e-07
T>C	ATA	A[T>C]A	5.18108e-05	0.00885573	0.00542598	0.00101402	0.00726276	0.00016414	0.0213536	0.0187713
T>C	ATC	A[T>C]C	2.08373e-14	0.00383523	0.00519329	0.00685994	0.00750599	0.00273952	0.0172772	0.0129667
T>C	ATG	A[T>C]G	4.21135e-07	3.00041e-21	0.00173234	0.00330037	0.0228342	2.22918e-21	0.0292458	0.0545989
T>C	ATT	A[T>C]T	0.00178664	0.0115232	0.00406016	0.002914	0.00065607	1.12356e-20	0.0140184	0.0208503
T>C	CTA	C[T>C]A	0.00142816	0.00352005	0.000270474	0.00678634	0.0049417	2.22918e-21	0.0212822	0.0124355
T>C	CTC	C[T>C]C	0.00169941	0.00445423	0.000609759	0.0515539	0.00656065	0.000556356	0.0121759	0.0176276
T>C	CTG	C[T>C]G	0.000593741	3.00041e-21	4.71871e-05	0.0380572	0.0327783	2.22918e-21	0.0304552	0.0540881
T>C	CTT	C[T>C]T	0.00250835	0.00528142	3.47445e-11	0.115755	0.003044	2.22918e-21	0.016571	0.0173621
T>C	GTA	G[T>C]A	1.50935e-20	1.88875e-20	0.00956427	3.97734e-21	0.00659865	0.00473169	0.116723	2.88303e-21
T>C	GTC	G[T>C]C	1.8293e-21	5.2715e-12	0.0153312	0.00964195	1.80492e-21	0.023501	0.0542769	0.00967843
T>C	GTG	G[T>C]G	1.8293e-21	3.00041e-21	0.00186332	0.00450961	0.00983402	0.00228597	0.0747779	0.0313797
T>C	GTT	G[T>C]T	0.000203597	0.00259485	0.0126151	0.00893493	0.000353501	3.33845e-05	0.0677183	0.0126184
T>C	TTA	T[T>C]A	0.00121993	0.00613643	0.00317736	0.00145623	0.00197468	0.000754184	0.0265185	0.00257481
T>C	TTC	T[T>C]C	0.00326306	0.000596231	0.00946892	0.0132113	0.00213303	0.00346362	0.0263685	0.00678339
T>C	TTG	T[T>C]G	0.000465567	3.00041e-21	0.00312362	0.00775594	0.00959672	2.22918e-21	0.0225081	0.0206027
T>C	TTT	T[T>C]T	0.00114168	0.00539041	0.0084005	0.00803247	0.000453378	2.22918e-21	0.0192472	0.00880703
T>G	ATA	A[T>G]A	0.00012554	0.00255033	0.000964658	0.00168781	1.80492e-21	2.22918e-21	0.000500983	0.00259163
T>G	ATC	A[T>G]C	1.2772e-10	0.00128518	0.00433026	0.00617185	0.000779464	2.22918e-21	0.00243801	0.00354915
T>G	ATG	A[T>G]G	0.000329401	0.00339642	0.00151131	0.00243805	0.000304677	4.45986e-05	0.00114194	0.00302317
T>G	ATT	A[T>G]T	0.000257072	9.02539e-12	0.0166894	0.030647	0.000613469	2.22918e-21	0.00145849	0.000939807
T>G	CTA	C[T>G]A	1.25532e-17	0.00185506	0.00248317	0.00168444	0.00038228	0.000321004	0.000910076	0.00189981
T>G	CTC	C[T>G]C	2.29964e-20	0.000871711	0.00140763	0.0234826	0.00475318	0.000602203	0.00136125	0.0110563
T>G	CTG	C[T>G]G	1.89121e-15	0.00419745	0.00335371	0.016773	0.00733585	2.83681e-05	0.00268364	0.0112222
T>G	CTT	C[T>G]T	1.8293e-21	3.00041e-21	0.00942057	0.293666	0.00364692	0.00104292	6.73218e-05	2.88303e-21
T>G	GTA	G[T>G]A	0.000109057	0.00374574	0.00130573	0.000404757	1.80492e-21	4.39435e-05	0.000405079	0.00112522
T>G	GTC	G[T>G]C	1.8293e-21	0.000257719	0.00250048	0.0105243	6.00877e-09	0.00227701	0.00138099	0.00518834
T>G	GTG	G[T>G]G	2.05116e-17	0.00381796	0.000944552	0.00490232	0.000609259	0.0015695	0.000853442	0.0049433
T>G	GTT	G[T>G]T	1.8293e-21	3.00041e-21	0.00192285	0.0725511	1.80492e-21	0.00350006	0.00306127	0.000704945
T>G	TTA	T[T>G]A	1.14441e-05	0.00323145	0.00743007	0.00129613	1.80492e-21	2.22918e-21	0.000133669	0.000721133
T>G	TTC	T[T>G]C	1.8293e-21	0.0024172	0.0112876	0.0124586	0.000103643	2.57468e-05	0.00143715	0.0034865
T>G	TTG	T[T>G]G	0.000477833	0.00722421	0.00317067	0.00183994	0.000385045	0.000113227	0.000165418	0.00258416
T>G	TTT	T[T>G]T	1.8293e-21	3.00041e-21	0.0803108	0.0535489	1.80492e-21	2.22918e-21	2.42649e-21	1.87398e-19
INS	A	INS_A	0.00369779	0.00649123	0.00143311	0.000365565	0.025884	0.000231426	2.42649e-21	2.88303e-21
INS	C	INS_C	0.00305115	3.00041e-21	0.000348894	3.97734e-21	0.024428	1.17897e-09	2.42649e-21	2.88303e-21
INS	G	INS_G	0.0024151	0.00154341	2.66287e-21	0.000721679	0.0221114	2.22918e-21	2.42649e-21	2.88303e-21
INS	T	INS_T	0.00643564	0.00366934	0.00114407	0.0014152	0.0225256	2.22918e-21	2.42649e-21	2.88303e-21
DEL	A	DEL_A	1.8293e-21	3.00041e-21	2.66287e-21	0.000373065	0.0746822	0.0037639	0.0034842	0.000147603
DEL	C	DEL_C	1.8293e-21	3.00041e-21	0.000153708	3.97734e-21	0.0803905	1.87097e-06	4.13331e-14	0.000484948
DEL	G	DEL_G	1.8293e-21	3.00041e-21	2.84444e-05	3.97734e-21	0.0786334	6.7324e-14	3.12475e-10	0.00139364
DEL	T	DEL_T	1.8293e-21	3.00041e-21	2.66287e-21	0.0010749	0.0618146	0.00671646	0.00467779	2.88303e-21

## Sheet: COADSTAD signatures
Substitution.Type	Trinucleotide	Somatic.Mutation.Type	Clock.1	Clock.2	POLE	X17.like	MMR.1	MMR.2	MMR.3	SNP
C>A	ACA	A[C>A]A	0.00213207	0.0189867	0.000619204	0.000464246	0.000848245	2.25333e-21	6.79745e-09	0.00259353
C>A	ACC	A[C>A]C	0.0016653	0.0219641	0.00169984	3.99311e-21	0.00221007	0.000352976	0.000475818	0.00521619
C>A	ACG	A[C>A]G	6.00862e-05	0.00654292	0.000135689	0.000577106	0.00046736	4.82889e-05	5.01723e-05	0.00443652
C>A	ACT	A[C>A]T	1.50337e-11	0.0130777	0.00727239	3.99311e-21	0.00383464	0.00249303	0.000649094	0.000964645
C>A	CCA	C[C>A]A	0.00512189	0.0186228	0.00214749	0.000258334	0.0164031	0.00279459	0.00289793	0.00654651
C>A	CCC	C[C>A]C	0.000389196	0.0114663	0.00164355	0.00107985	0.0468646	0.00305136	0.00309723	0.00650763
C>A	CCG	C[C>A]G	0.0045027	0.00331097	0.00063501	3.99311e-21	0.0176192	0.00295311	0.00338962	0.0140182
C>A	CCT	C[C>A]T	0.00479085	0.00580559	0.0122429	3.99311e-21	0.109523	0.0143248	0.0225217	0.00387826
C>A	GCA	G[C>A]A	0.00413642	0.0313179	0.000772493	0.00122375	0.00125693	0.00238089	2.44646e-21	0.00640745
C>A	GCC	G[C>A]C	1.24123e-07	0.018885	0.00243544	0.000536752	0.00700935	0.00728259	0.00297016	0.00561149
C>A	GCG	G[C>A]G	0.00110092	0.00747726	5.74965e-05	3.99311e-21	0.00245556	0.00179774	0.000555553	0.0161019
C>A	GCT	G[C>A]T	4.8579e-09	0.0155413	0.00685049	3.99311e-21	0.0113019	0.0256361	0.00681306	0.00368132
C>A	TCA	T[C>A]A	0.00197674	0.0203514	0.034717	0.00108924	0.000173318	0.000461691	2.44646e-21	0.000349383
C>A	TCC	T[C>A]C	0.00284923	0.02409	0.00616941	3.63788e-18	0.00567135	0.00181894	3.17915e-19	0.00392454
C>A	TCG	T[C>A]G	0.000648923	0.00762105	0.00321198	3.1796e-14	0.000943433	0.00174633	2.44646e-21	0.00426095
C>A	TCT	T[C>A]T	4.85874e-10	3.03594e-21	0.232608	3.99311e-21	0.0130601	0.00276077	0.000299657	2.88888e-21
C>G	ACA	A[C>G]A	0.000226129	0.00895726	0.000407791	0.000249118	0.000746578	0.000499733	0.000325673	0.00549614
C>G	ACC	A[C>G]C	0.000574592	0.0110396	0.000416727	0.00114534	0.00166718	6.32653e-05	0.00101178	0.00368371
C>G	ACG	A[C>G]G	1.85829e-21	0.00395601	4.53229e-05	3.99311e-21	0.000125608	2.25333e-21	2.44646e-21	0.00689793
C>G	ACT	A[C>G]T	0.000514999	0.0133356	2.67118e-21	3.99311e-21	0.0021894	2.99512e-10	0.00102912	0.00445597
C>G	CCA	C[C>G]A	1.85829e-21	0.0122486	2.24608e-05	0.000438078	2.96117e-21	6.4125e-12	1.94831e-05	0.00491002
C>G	CCC	C[C>G]C	1.85829e-21	0.00584995	6.44859e-05	0.000474517	2.96117e-21	2.25333e-21	2.44646e-21	0.00940811
C>G	CCG	C[C>G]G	1.85829e-21	0.00218007	2.67118e-21	0.000527812	2.96117e-21	0.000158096	2.44646e-21	0.0137351
C>G	CCT	C[C>G]T	0.000113315	0.0137539	2.67118e-21	3.99311e-21	0.00040209	0.000122494	0.00022042	0.00416893
C>G	GCA	G[C>G]A	2.78646e-12	0.00637631	6.77276e-05	0.000939809	0.000835752	0.000132129	0.000400303	0.0058054
C>G	GCC	G[C>G]C	0.00163142	0.00771184	1.12926e-05	3.99311e-21	0.00381146	2.25333e-21	0.00307085	0.00862352
C>G	GCG	G[C>G]G	1.85829e-21	0.00108075	2.67118e-21	0.000114797	0.000331678	2.25333e-21	2.44646e-21	0.00818532
C>G	GCT	G[C>G]T	1.85829e-21	0.00986042	0.000362762	3.99311e-21	0.00145237	0.000455277	0.000274817	0.00643617
C>G	TCA	T[C>G]A	1.85829e-21	0.0265033	2.67118e-21	0.000515272	2.96117e-21	2.25333e-21	2.44646e-21	0.000570574
C>G	TCC	T[C>G]C	0.000156572	0.0184923	2.67118e-21	0.000814624	0.000583603	6.56975e-05	0.000106934	0.00728693
C>G	TCG	T[C>G]G	1.85829e-21	0.00544215	5.18417e-05	0.000695936	2.96117e-21	7.82726e-05	1.39001e-05	0.00497067
C>G	TCT	T[C>G]T	1.85829e-21	0.0417854	0.000157184	0.00165298	3.74153e-13	0.000247324	0.000314781	0.00455647
C>T	ACA	A[C>T]A	0.0108041	0.0159071	0.000438138	0.00606942	0.0275329	0.00670379	0.0075673	0.0197531
C>T	ACC	A[C>T]C	0.00924986	0.0211072	0.00326703	0.00190074	0.0140432	0.0129506	0.0115452	0.0141023
C>T	ACG	A[C>T]G	0.283419	0.0238625	0.00990154	0.00570669	0.0402842	0.0633643	0.0432923	0.068615
C>T	ACT	A[C>T]T	0.00473761	0.0170366	0.00490158	0.00245357	0.0124886	0.00308838	0.00500545	0.0183751
C>T	CCA	C[C>T]A	0.00719153	0.0359711	0.000877691	0.00738954	0.00931559	0.0029986	0.00341251	0.0148578
C>T	CCC	C[C>T]C	0.0061291	0.0268125	0.00213578	0.0030972	0.0105937	0.00756085	0.0104266	0.0247084
C>T	CCG	C[C>T]G	0.271397	0.0093453	0.00243976	0.0105085	0.0539992	0.0465903	0.0425947	0.104684
C>T	CCT	C[C>T]T	0.00577234	0.0344891	0.00372192	0.00444643	0.00884452	0.0071931	0.00635759	0.0283863
C>T	GCA	G[C>T]A	0.00769478	0.0144929	0.00122665	0.00198992	0.0679531	0.0348389	0.0202	0.0142776
C>T	GCC	G[C>T]C	7.51351e-08	0.00358078	0.0175694	0.00282035	0.0797685	0.126173	0.0476506	0.0182747
C>T	GCG	G[C>T]G	0.200981	1.03528e-12	0.0397623	0.00933509	0.109259	0.436393	0.0265415	0.0357381
C>T	GCT	G[C>T]T	0.00221373	0.00682576	0.0249689	0.00151817	0.0428546	0.0742415	0.0271819	0.0281251
C>T	TCA	T[C>T]A	0.00308627	0.060181	0.00375882	0.00898492	0.00438224	0.00497687	0.00727953	0.00416725
C>T	TCC	T[C>T]C	0.00426202	0.0496085	0.0200399	0.00890501	0.00561904	0.0113532	0.00931499	0.0128009
C>T	TCG	T[C>T]G	0.127806	0.0100658	0.274809	0.00230516	0.0205651	0.0214351	0.0182225	0.0287678
C>T	TCT	T[C>T]T	0.00263912	0.0415367	0.0399845	0.00678161	0.00237724	0.00457125	0.00640902	0.00915145
T>A	ATA	A[T>A]A	0.000174349	0.00594944	0.000179635	0.000570131	2.96117e-21	0.00013114	0.00544835	2.88888e-21
T>A	ATC	A[T>A]C	1.85829e-21	0.00740644	5.19527e-05	0.0010288	2.96117e-21	0.00487503	0.0184291	2.88888e-21
T>A	ATG	A[T>A]G	0.000185579	0.0102217	9.33446e-05	0.00125026	0.00020772	0.000446151	0.00166475	0.00274558
T>A	ATT	A[T>A]T	0.00106424	0.0084174	0.0013326	0.00243476	0.00366303	0.00218874	0.00560454	2.88888e-21
T>A	CTA	C[T>A]A	0.000239451	0.00571774	5.83318e-05	0.000855567	0.000313656	2.25333e-21	0.00065099	2.88888e-21
T>A	CTC	C[T>A]C	1.85829e-21	0.00849255	0.000136751	0.0125099	0.00382781	0.000735368	0.00363065	0.00275595
T>A	CTG	C[T>A]G	0.00132853	0.0152193	0.000248407	0.00736604	3.41041e-06	7.80032e-05	0.00177061	0.00743928
T>A	CTT	C[T>A]T	1.85829e-21	0.0136935	2.67118e-21	0.0378305	0.00276149	2.25333e-21	0.00025001	0.000347182
T>A	GTA	G[T>A]A	2.43406e-15	0.00436075	0.000108882	3.99311e-21	0.000312433	0.000450314	0.00315026	0.00016599
T>A	GTC	G[T>A]C	1.85829e-21	0.00494806	2.67118e-21	0.0031313	0.000572579	0.00406603	0.0116531	2.88888e-21
T>A	GTG	G[T>A]G	1.85829e-21	0.00656506	2.67118e-21	0.00183538	0.00215615	0.000106611	0.00153652	0.0027528
T>A	GTT	G[T>A]T	1.85829e-21	0.00633652	2.67118e-21	0.00696647	0.00125875	0.00141419	0.00314376	2.88888e-21
T>A	TTA	T[T>A]A	1.85829e-21	0.00603265	0.00015472	0.000924092	0.000827083	0.000360981	0.00177415	2.88888e-21
T>A	TTC	T[T>A]C	0.000348073	0.00893065	0.000310258	0.00302699	7.94625e-07	0.000231075	0.00323911	1.65751e-08
T>A	TTG	T[T>A]G	0.000227935	0.00486055	2.67118e-21	0.00113723	0.000117188	0.000365754	0.000840041	0.000418139
T>A	TTT	T[T>A]T	0.00053565	0.0103215	0.00206269	0.00503506	0.000103655	7.68336e-05	0.000344861	6.02133e-07
T>C	ATA	A[T>C]A	5.26318e-05	0.00896061	0.0054429	0.00101804	0.0119153	0.000165918	0.0215293	0.0188094
T>C	ATC	A[T>C]C	2.11675e-14	0.00388065	0.00520948	0.00688714	0.0123144	0.00276919	0.0174194	0.012993
T>C	ATG	A[T>C]G	4.27809e-07	3.03594e-21	0.00173774	0.00331346	0.037462	2.25333e-21	0.0294864	0.0547097
T>C	ATT	A[T>C]T	0.00181495	0.0116597	0.00407282	0.00292555	0.00107635	1.13573e-20	0.0141338	0.0208926
T>C	CTA	C[T>C]A	0.00145079	0.00356173	0.000271317	0.00681326	0.00810739	2.25333e-21	0.0214573	0.0124608
T>C	CTC	C[T>C]C	0.00172634	0.00450698	0.000611661	0.0517584	0.0107635	0.000562381	0.0122761	0.0176634
T>C	CTG	C[T>C]G	0.000603149	3.03594e-21	4.73342e-05	0.0382081	0.0537763	2.25333e-21	0.0307059	0.054198
T>C	CTT	C[T>C]T	0.0025481	0.00534397	3.48528e-11	0.116214	0.00499401	2.25333e-21	0.0167074	0.0173974
T>C	GTA	G[T>C]A	1.53327e-20	1.91112e-20	0.00959409	3.99311e-21	0.0108258	0.00478293	0.117684	2.88888e-21
T>C	GTC	G[T>C]C	1.85829e-21	5.33393e-12	0.015379	0.00968019	2.96117e-21	0.0237555	0.0547235	0.00969808
T>C	GTG	G[T>C]G	1.85829e-21	3.03594e-21	0.00186913	0.00452749	0.0161338	0.00231073	0.0753933	0.0314434
T>C	GTT	G[T>C]T	0.000206823	0.00262558	0.0126544	0.00897037	0.000579956	3.3746e-05	0.0682756	0.012644
T>C	TTA	T[T>C]A	0.00123926	0.0062091	0.00318726	0.00146201	0.00323967	0.000762351	0.0267368	0.00258004
T>C	TTC	T[T>C]C	0.00331477	0.000603292	0.00949844	0.0132637	0.00349946	0.00350113	0.0265855	0.00679716
T>C	TTG	T[T>C]G	0.000472945	3.03594e-21	0.00313336	0.0077867	0.0157445	2.25333e-21	0.0226934	0.0206445
T>C	TTT	T[T>C]T	0.00115977	0.00545425	0.00842669	0.00806433	0.000743815	2.25333e-21	0.0194056	0.00882491
T>G	ATA	A[T>G]A	0.000127529	0.00258053	0.000967666	0.0016945	2.96117e-21	2.25333e-21	0.000505106	0.00259689
T>G	ATC	A[T>G]C	1.29744e-10	0.0013004	0.00434377	0.00619633	0.0012788	2.25333e-21	0.00245807	0.00355636
T>G	ATG	A[T>G]G	0.00033462	0.00343664	0.00151602	0.00244772	0.000499855	4.50816e-05	0.00115134	0.00302931
T>G	ATT	A[T>G]T	0.000261146	9.13227e-12	0.0167414	0.0307685	0.00100646	2.25333e-21	0.00147049	0.000941715
T>G	CTA	C[T>G]A	1.27522e-17	0.00187703	0.00249092	0.00169112	0.000627172	0.00032448	0.000917565	0.00190366
T>G	CTC	C[T>G]C	2.33608e-20	0.000882034	0.00141202	0.0235757	0.0077981	0.000608725	0.00137245	0.0110788
T>G	CTG	C[T>G]G	1.92118e-15	0.00424716	0.00336416	0.0168395	0.0120353	2.86753e-05	0.00270572	0.011245
T>G	CTT	C[T>G]T	1.85829e-21	3.03594e-21	0.00944994	0.294831	0.00598316	0.00105421	6.78758e-05	2.88888e-21
T>G	GTA	G[T>G]A	0.000110785	0.0037901	0.0013098	0.000406362	2.96117e-21	4.44194e-05	0.000408413	0.00112751
T>G	GTC	G[T>G]C	1.85829e-21	0.000260771	0.00250828	0.010566	9.85803e-09	0.00230167	0.00139235	0.00519887
T>G	GTG	G[T>G]G	2.08366e-17	0.00386318	0.000947497	0.00492176	0.000999555	0.0015865	0.000860465	0.00495334
T>G	GTT	G[T>G]T	1.85829e-21	3.03594e-21	0.00192884	0.0728389	2.96117e-21	0.00353797	0.00308646	0.000706376
T>G	TTA	T[T>G]A	1.16254e-05	0.00326971	0.00745324	0.00130127	2.96117e-21	2.25333e-21	0.000134769	0.000722597
T>G	TTC	T[T>G]C	1.85829e-21	0.00244582	0.0113227	0.012508	0.000170037	2.60256e-05	0.00144898	0.00349357
T>G	TTG	T[T>G]G	0.000485405	0.00730976	0.00318055	0.00184724	0.000631707	0.000114453	0.000166779	0.00258941
T>G	TTT	T[T>G]T	1.85829e-21	3.03594e-21	0.0805612	0.0537613	2.96117e-21	2.25333e-21	2.44646e-21	1.87778e-19
