# Supplementary material for: Mutational signatures of DNA mismatch repair deficiency in C. elegans and human cancers
Source: HighWire-hosted journal article supplement (doi:10.1101/gr.226845.117), 2018-04-10
Supplement: Supplemental_Table_S6.xlsx [file Supplemental_Table_S6.xlsx]

## Sheet: Legend
Supplementary Table 6. ENA accession numbers for raw data from all C.elegans samples
Accession_Number		ENA accession number
Donor_ID		Sample ID
Genotype		Genetic background of the sample
Generation		Number of generations it has been propagated for

## Sheet: Sheet1
Accession_Number	Donor_ID	Genotype	Generation
ERS204913	CD0093a	N2	F1
ERS204914	CD0093c	N2	F1
ERS204915	CD0093d	N2	F1
ERS204925	CD0097a	mlh-1	F1
ERS204926	CD0097c	mlh-1	F1
ERS204927	CD0097d	mlh-1	F1
ERS204928	CD0098a	pms-2	F1
ERS204929	CD0098c	pms-2	F1
ERS204930	CD0098d	pms-2	F1
ERS227578	CD0103a	pole-4	F20
ERS227579	CD0103c	pole-4	F20
ERS227580	CD0103d	pole-4	F20
ERS227591	CD0103b	pole-4	P0
ERS361461	CD0130a	N2	F20
ERS361462	CD0130c	N2	F20
ERS361463	CD0130d	N2	F20
ERS361473	CD0134a	mlh-1	F20
ERS361474	CD0134c	mlh-1	F20
ERS361475	CD0134d	mlh-1	F20
ERS361476	CD0135a	pms-2	F20
ERS361477	CD0135c	pms-2	F20
ERS361478	CD0135d	pms-2	F20
ERS527850	CD0243a	N2	P0
ERS527851	CD0243c	N2	F10
ERS527852	CD0243d	N2	F10
ERS527853	CD0243e	N2	F10
ERS527854	CD0244a	pms-2	F10
ERS527855	CD0244c	pms-2	F10
ERS527856	CD0244d	pms-2	F10
ERS527857	CD0245a	pole-4	P0
ERS527858	CD0245c	pole-4	F10
ERS527859	CD0245d	pole-4	F10
ERS527860	CD0245e	pole-4	F10
ERS527861	CD0246a	pole-4; pms-2	P0
ERS527863	CD0246d	pole-4; pms-2	F10
ERS527864	CD0246e	pole-4; pms-2	F10
